# Supplementary material
Source: MDPI journal article supplement (https://www.mdpi.com/2073-4395/10/11/1667)
Supplement: s1 [file s1]

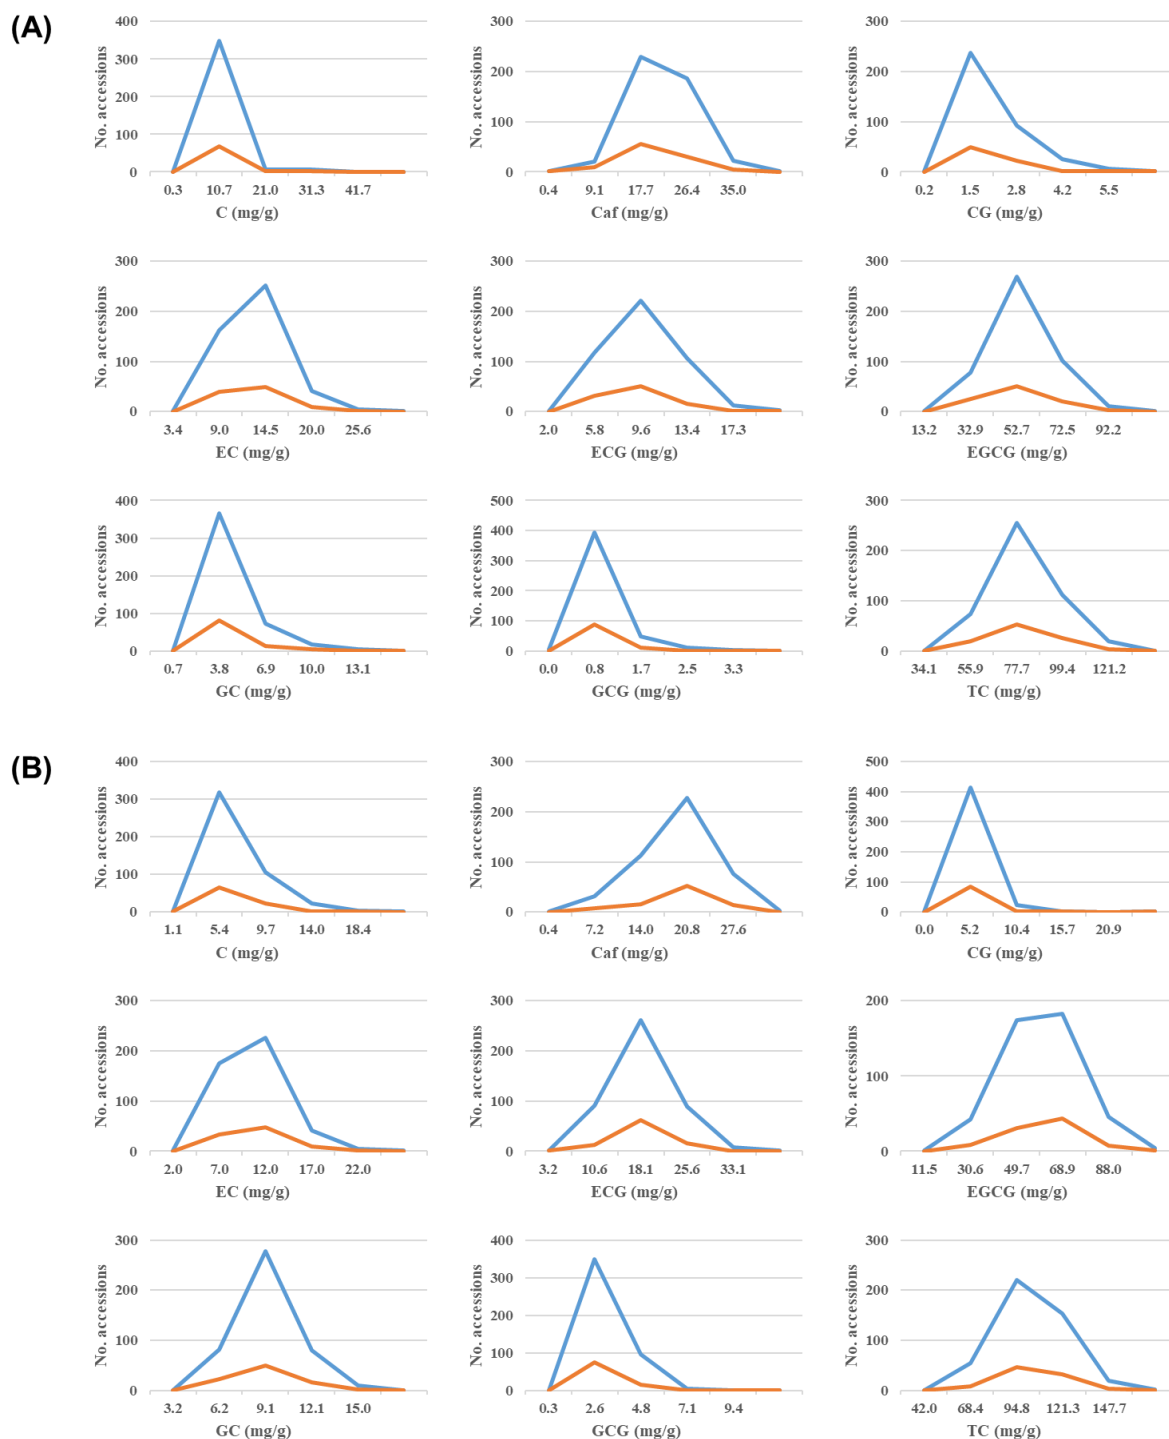

**Figure S1.** Distribution of phytochemicals between entire collection and core collection in 2018 (A) and 2019 (B). Blue line, entire collection; Orange line, core collection. C, (+)-Catechin; Caf, Caffeine; CG, (-)-Catechin 3-gallate; EC, (-)-Epicatechin; ECG, (-)-Epigallocatechin 3-gallate; EGCG, (-)-Gallocatechin 3-gallate; GC, (-)-Gallocatechin; GCG, (-)-Gallocatechin 3-gallate; TC, total catechin.
