# Supplementary material
Source: MDPI journal article supplement (https://www.mdpi.com/2073-4395/10/11/1667)
Supplement: s1 [file s1]

Archive with 5 entries (5 files):
- Supplementary Figure.pdf
- Supplementary Tables S1.pdf
- Supplementary Tables S2.pdf
- Supplementary TablesS3.pdf
- Supplementary Tabless4.pdf
