# Supplementary material
Source: MDPI journal article supplement (https://www.mdpi.com/2073-4395/10/11/1667)
Supplement: s1 [file s1]

Table S1. List and the content of phytochemicals of 462 tea accessions in this study

| Accessions<br>No. | Origin | C <sup>l</sup> |       | Caf  |      | Cg   |      | EC   |      | ECG  |      | EGCG |      | G <sup>i</sup> |
|-------------------|--------|----------------|-------|------|------|------|------|------|------|------|------|------|------|----------------|
|                   |        | 2018           | 2019  | 2018 | 2019 | 2018 | 2019 | 2018 | 2019 | 2018 | 2019 | 2018 | 2019 | 2018           |
| IT290530          | KOR    | 1.44           | 3.01  | 13.4 | 12.3 | 0.9  | 1.7  | 7.9  | 6.0  | 6.0  | 8.9  | 45.9 | 41.3 | 6.7            |
| IT290531          | KOR    | 3.40           | 4.08  | 17.6 | 13.6 | 1.4  | 1.4  | 11.6 | 14.3 | 6.2  | 9.3  | 36.6 | 26.4 | 4.0            |
| IT290532          | KOR    | 1.58           | 4.34  | 21.5 | 13.4 | 1.6  | 2.1  | 7.3  | 4.4  | 7.7  | 11.9 | 56.2 | 44.4 | 3.2            |
| IT290533          | KOR    | 2.40           | 9.12  | 12.0 | 10.7 | 3.9  | 5.1  | 8.8  | 5.8  | 13.1 | 14.3 | 55.2 | 43.3 | 1.5            |
| IT290534          | KOR    | 1.86           | 2.76  | 16.1 | 13.1 | 0.7  | 3.8  | 16.4 | 12.2 | 9.5  | 13.3 | 46.7 | 38.0 | 4.0            |
| IT290535          | KOR    | -              | 3.69  | 19.1 | 16.8 | 0.5  | 1.4  | 11.8 | 6.1  | 8.3  | 12.5 | 48.7 | 45.3 | 5.5            |
| IT290536          | KOR    | 2.74           | 4.94  | 18.5 | 18.4 | -    | 0.6  | 15.5 | 11.7 | 14.6 | 15.9 | 65.1 | 63.0 | 5.9            |
| IT290537          | KOR    | 2.81           | 11.32 | 19.3 | 11.8 | 0.4  | 8.1  | 8.2  | 7.4  | 7.5  | 10.2 | 62.5 | 39.7 | 2.9            |
| IT290538          | KOR    | 1.65           | 5.18  | 22.5 | 6.2  | 0.2  | 6.0  | 9.3  | 5.7  | 4.6  | 7.1  | 40.7 | 28.2 | 2.4            |
| IT290539          | KOR    | 3.03           | 2.27  | 13.3 | 8.9  | 0.2  | 1.8  | 14.6 | 11.5 | 6.1  | 8.1  | 34.1 | 33.2 | 4.4            |
| IT290540          | KOR    | 3.74           | 5.57  | 13.1 | 12.8 | 1.4  | 1.5  | 8.5  | 6.0  | 9.3  | 12.8 | 67.5 | 59.7 | 2.1            |
| IT290541          | KOR    | 1.97           | 11.38 | 16.5 | 3.7  | 0.5  | 10.6 | 10.2 | 4.8  | 10.0 | 7.6  | 41.9 | 25.9 | 2.8            |
| IT290542          | KOR    | 1.80           | 2.65  | 23.3 | 18.6 | 0.9  | 2.4  | 11.1 | 9.5  | 13.2 | 18.5 | 76.3 | 65.2 | 1.3            |
| IT290543          | KOR    | 3.99           | 4.16  | 18.9 | 18.9 | 4.3  | 2.4  | 10.4 | 6.3  | 12.2 | 17.0 | 64.6 | 58.5 | 3.7            |
| IT290544          | KOR    | -              | 7.09  | 23.7 | 12.8 | -    | 2.8  | 13.2 | 12.1 | 9.7  | 11.5 | 55.9 | 38.3 | 3.6            |
| IT290545          | KOR    | 1.83           | 7.49  | 18.6 | 20.5 | 3.4  | 1.3  | 11.8 | 8.4  | 18.0 | 20.1 | 70.4 | 63.3 | 3.3            |
| IT290546          | KOR    | -              | 8.44  | 16.9 | 9.1  | -    | 1.9  | 8.3  | 15.3 | 10.7 | 15.6 | 55.4 | 30.8 | 2.4            |
| IT290547          | KOR    | 4.42           | 3.65  | 21.5 | 12.6 | 0.7  | 5.4  | 10.6 | 5.9  | 11.3 | 14.6 | 49.0 | 39.3 | 2.8            |
| IT290548          | KOR    | 0.97           | 9.47  | 13.6 | 7.6  | 0.3  | 4.3  | 12.2 | 10.2 | 5.4  | 6.1  | 42.5 | 29.1 | 2.9            |
| IT290549          | KOR    | 2.33           | 3.08  | 13.6 | 14.4 | 3.1  | 1.6  | 9.1  | 5.0  | 11.1 | 16.4 | 50.2 | 47.1 | 4.2            |
| IT290550          | KOR    | -              | 12.78 | 15.0 | 0.4  | 0.7  | 4.2  | 10.0 | 10.7 | 7.7  | 7.2  | 39.9 | 16.2 | 2.5            |
| IT290551          | KOR    | 1.75           | 8.61  | 16.9 | 4.5  | 0.8  | 3.1  | 10.0 | 12.7 | 4.8  | 5.8  | 30.7 | 17.0 | 2.3            |
| IT290552          | KOR    | 2.49           | 3.32  | 23.6 | 17.4 | 1.1  | 3.4  | 12.3 | 9.3  | 12.1 | 17.5 | 56.7 | 49.1 | 3.0            |
| IT290553          | KOR    | 5.14           | 2.02  | 22.7 | 14.7 | 1.3  | 1.6  | 7.0  | 4.4  | 6.9  | 10.9 | 58.8 | 53.9 | 2.0            |
| IT290554          | KOR    | 4.28           | 2.81  | 23.1 | 17.5 | 0.6  | 3.4  | 11.6 | 5.4  | 13.7 | 20.1 | 58.4 | 54.2 | 2.8            |
| IT290555          | KOR    | 2.11           | 4.97  | 17.8 | 18.7 | 2.2  | 1.3  | 12.1 | 8.8  | 8.7  | 14.2 | 60.3 | 52.5 | 4.2            |
| IT290556          | KOR    | 1.76           | 4.77  | 22.9 | 15.0 | 0.6  | 1.3  | 10.6 | 6.7  | 9.4  | 10.8 | 45.5 | 40.9 | 4.9            |
| IT290557          | KOR    | 2.89           | 1.99  | 21.6 | 13.4 | -    | 2.0  | 10.1 | 3.7  | 8.5  | 10.1 | 45.3 | 40.6 | 3.6            |
| IT290558          | KOR    | 3.45           | 1.78  | 28.0 | 11.5 | -    | 1.7  | 15.8 | 11.6 | 10.8 | 13.2 | 43.9 | 36.7 | 4.0            |
| IT290559          | KOR    | 2.57           | 2.93  | 36.6 | 20.3 | 0.2  | 1.9  | 11.2 | 5.0  | 6.4  | 9.7  | 57.7 | 52.2 | 2.9            |
| IT290560          | KOR    | 1.54           | 4.04  | 20.5 | 12.5 | 0.2  | 2.1  | 10.2 | 8.0  | 9.9  | 13.7 | 45.7 | 36.5 | 1.3            |
| IT290561          | KOR    | -              | 6.68  | 15.2 | 10.7 | 0.8  | 1.7  | 7.3  | 9.4  | 8.2  | 11.3 | 55.5 | 47.8 | 10.5           |
| IT290562          | KOR    | 2.30           | 2.06  | 20.9 | 17.7 | 0.2  | 2.5  | 11.4 | 4.6  | 11.0 | 16.2 | 47.5 | 41.0 | 1.6            |
| IT290563          | KOR    | 2.71           | 3.68  | 15.5 | 16.5 | 3.8  | 1.1  | 11.5 | 4.2  | 6.8  | 13.9 | 39.1 | 49.2 | 11.8           |
| IT290564          | KOR    | 4.80           | 8.46  | 13.9 | 5.5  | 0.2  | 3.4  | 5.6  | 8.7  | 8.2  | 8.6  | 43.3 | 32.2 | 1.8            |
| IT290565          | KOR    | 2.11           | 2.08  | 19.0 | 10.4 | -    | 1.5  | 15.3 | 10.6 | 8.3  | 9.2  | 34.9 | 30.1 | 1.9            |
| IT290566          | KOR    | 1.61           | 1.78  | 23.4 | 13.4 | -    | 2.1  | 13.9 | 6.8  | 7.1  | 8.8  | 43.6 | 44.9 | 1.6            |
| IT290567          | KOR    | 4.08           | 2.12  | 30.6 | 16.9 | 0.2  | 3.7  | 11.8 | 6.3  | 12.4 | 20.7 | 60.4 | 53.5 | 2.9            |
| IT290568          | KOR    | 3.03           | 1.51  | 26.7 | 15.0 | 3.3  | 2.7  | 10.6 | 5.7  | 8.8  | 12.4 | 63.5 | 55.2 | 2.2            |
| IT290569          | KOR    | 1.10           | 1.88  | 21.2 | 14.0 | 0.2  | 1.4  | 15.2 | 5.4  | 8.1  | 10.9 | 50.4 | 52.0 | 2.4            |
| IT290570          | KOR    | 1.70           | 1.79  | 16.3 | 13.9 | 1.9  | 1.0  | 12.0 | 5.4  | 5.5  | 11.0 | 35.0 | 32.2 | 7.5            |
| IT290571          | KOR    | 1.55           | 2.93  | 21.1 | 12.8 | 0.3  | 2.1  | 11.2 | 5.5  | 5.9  | 8.9  | 44.7 | 35.0 | 3.6            |
| IT290572          | KOR    | 6.30           | 1.38  | 14.3 | 12.2 | 2.3  | 2.0  | 12.8 | 6.7  | 11.2 | 14.7 | 43.9 | 40.3 | 2.8            |
| IT290573          | KOR    | 3.01           | 6.15  | 10.5 | 6.6  | 1.5  | 5.6  | 8.2  | 7.5  | 6.5  | 8.1  | 37.6 | 29.0 | 3.3            |
| IT290574          | KOR    | -              | 1.79  | 18.4 | 14.9 | 0.8  | 1.2  | 17.6 | 10.5 | 9.0  | 10.4 | 50.7 | 46.7 | 4.5            |
| IT290575          | KOR    | -              | 8.32  | 15.1 | 8.9  | -    | 4.7  | 9.0  | 7.0  | 7.0  | 12.2 | 46.3 | 26.7 | 5.8            |



|          |     |       |       |      |      |     |     |      |      |      |      |      |      |     |
|----------|-----|-------|-------|------|------|-----|-----|------|------|------|------|------|------|-----|
| IT290576 | KOR | 27.62 | 4.55  | 1.1  | 10.8 | 2.0 | 3.4 | 15.0 | 6.9  | 4.2  | 9.2  | 13.2 | 30.9 | 5.0 |
| IT290580 | KOR | 1.05  | 4.43  | 18.5 | 12.0 | 0.2 | 1.8 | 9.7  | 7.3  | 6.6  | 8.4  | 43.2 | 37.0 | 1.2 |
| IT290581 | KOR | 2.75  | 1.42  | 17.2 | 9.5  | 5.6 | 3.2 | 5.9  | 3.3  | 9.2  | 12.1 | 52.8 | 43.9 | 1.7 |
| IT290582 | KOR | 0.62  | 3.14  | 16.8 | 11.8 | 1.6 | 2.0 | 8.2  | 5.8  | 10.1 | 14.9 | 43.6 | 36.3 | 2.1 |
| IT290583 | KOR | 0.77  | 12.04 | 11.9 | 6.5  | -   | 5.1 | 10.4 | 10.7 | 6.3  | 7.4  | 42.7 | 24.1 | 3.7 |
| IT290584 | KOR | 1.05  | 4.68  | 20.5 | 21.1 | 0.3 | 1.4 | 13.6 | 12.0 | 8.2  | 13.5 | 58.1 | 52.0 | 3.9 |
| IT290585 | KOR | 2.67  | 2.49  | 16.7 | 15.5 | 1.7 | 2.0 | 12.2 | 7.3  | 10.1 | 15.8 | 52.2 | 52.8 | 4.2 |
| IT290586 | KOR | 6.07  | 4.60  | 19.2 | 17.3 | 1.7 | 0.4 | 11.4 | 7.3  | 11.5 | 15.2 | 54.3 | 47.6 | 6.8 |
| IT290587 | KOR | 3.10  | 6.52  | 19.3 | 12.1 | 0.2 | 1.1 | 8.1  | 9.2  | 12.0 | 17.8 | 51.9 | 39.3 | 1.0 |
| IT290588 | KOR | 3.53  | 7.09  | 21.3 | 20.5 | 0.7 | 4.4 | 9.4  | 5.8  | 14.1 | 18.2 | 66.2 | 60.6 | 2.1 |
| IT290589 | KOR | 0.67  | 2.31  | 19.0 | 17.2 | 0.9 | 0.8 | 15.8 | 9.9  | 8.6  | 11.5 | 30.8 | 36.6 | 8.5 |
| IT290590 | KOR | 2.07  | 1.53  | 17.8 | 14.9 | 0.2 | 3.7 | 12.9 | 7.7  | 12.4 | 15.3 | 46.7 | 43.5 | 1.7 |
| IT290591 | KOR | 2.01  | 5.45  | 21.1 | 7.3  | -   | 1.9 | 4.4  | 3.6  | 5.3  | 4.7  | 40.0 | 23.9 | 1.9 |
| IT290592 | KOR | 3.51  | 6.47  | 25.6 | 20.5 | 3.4 | 2.9 | 12.3 | 8.4  | 13.0 | 24.4 | 76.5 | 71.2 | 4.8 |
| IT290593 | KOR | -     | 10.88 | 14.7 | 7.0  | 0.4 | 5.5 | 10.2 | 15.2 | 10.8 | 11.4 | 54.1 | 32.7 | 1.4 |
| IT290594 | KOR | 2.49  | 2.03  | 29.3 | 18.0 | 0.4 | 2.2 | 12.0 | 7.0  | 11.9 | 16.1 | 73.7 | 56.1 | 2.3 |
| IT290595 | KOR | -     | 3.56  | 11.1 | 15.7 | -   | 2.0 | 10.5 | 8.9  | 8.0  | 11.5 | 53.3 | 46.4 | 3.4 |
| IT290596 | KOR | 7.10  | 13.86 | 16.4 | 15.1 | 1.6 | 3.4 | 4.8  | 2.0  | 11.1 | 18.8 | 62.0 | 54.1 | 7.3 |
| IT290597 | KOR | 0.89  | 2.81  | 19.7 | 8.3  | -   | 6.1 | 7.9  | 9.3  | 7.1  | 12.5 | 54.2 | 37.6 | 2.1 |
| IT290598 | KOR | 3.66  | 2.30  | 19.9 | 8.0  | 0.7 | 3.0 | 4.0  | 2.3  | 5.8  | 5.5  | 45.5 | 36.0 | 2.4 |
| IT290599 | KOR | 2.96  | 1.55  | 24.9 | 9.6  | -   | 1.2 | 12.5 | 6.9  | 9.7  | 11.6 | 55.8 | 47.2 | 3.0 |
| IT290600 | KOR | 3.73  | 3.62  | 19.3 | 13.9 | 2.6 | 3.0 | 9.3  | 8.7  | 8.3  | 14.5 | 53.3 | 48.4 | 2.1 |
| IT290601 | KOR | 2.79  | 1.88  | 22.6 | 18.8 | 0.5 | 1.4 | 5.6  | 3.1  | 8.8  | 14.2 | 46.4 | 42.9 | 5.3 |
| IT290602 | KOR | -     | 2.13  | 23.8 | 18.8 | 2.1 | 1.3 | 11.1 | 9.9  | 10.8 | 15.5 | 53.2 | 52.9 | 2.1 |
| IT290603 | KOR | -     | 3.14  | 24.1 | 11.6 | 0.5 | 2.2 | 10.1 | 8.2  | 7.1  | 8.6  | 57.7 | 40.5 | 2.0 |
| IT290604 | KOR | 5.07  | 3.11  | 16.1 | 12.1 | 1.1 | 0.8 | 10.5 | 11.0 | 7.3  | 14.1 | 44.8 | 41.4 | 1.9 |
| IT290605 | KOR | 2.25  | 1.32  | 21.0 | 17.6 | 1.1 | 1.7 | 10.8 | 7.0  | 10.6 | 15.6 | 52.6 | 57.0 | 2.3 |
| IT290606 | KOR | 0.97  | 2.45  | 14.6 | 16.3 | 0.7 | 0.5 | 11.5 | 8.1  | 7.7  | 13.5 | 52.2 | 51.0 | 1.4 |
| IT290607 | KOR | 5.25  | 13.02 | 19.1 | 8.3  | 1.2 | 0.5 | 18.8 | 12.6 | 6.5  | 9.2  | 28.9 | 27.7 | 3.5 |
| IT290608 | KOR | 1.73  | 4.48  | 20.4 | 14.0 | 0.3 | 1.7 | 8.3  | 6.5  | 5.7  | 8.3  | 49.0 | 46.1 | 2.1 |
| IT290609 | KOR | 3.89  | 3.56  | 12.7 | 14.8 | 0.2 | 0.8 | 16.0 | 7.0  | 8.0  | 14.7 | 35.5 | 40.5 | 4.8 |
| IT290610 | KOR | -     | 4.28  | 16.3 | 9.3  | 1.0 | 2.0 | 13.6 | 7.3  | 9.2  | 12.2 | 31.9 | 22.9 | 5.8 |
| IT290611 | KOR | 2.28  | 11.76 | 19.3 | 16.0 | 2.3 | 2.9 | 9.8  | 5.8  | 10.1 | 18.1 | 67.4 | 56.1 | 2.4 |
| IT290612 | KOR | 8.28  | 5.37  | 15.8 | 10.7 | 3.9 | 1.5 | 12.0 | 9.2  | 9.6  | 15.8 | 45.4 | 55.1 | 5.2 |
| IT290613 | KOR | 1.79  | 2.13  | 18.2 | 12.5 | 0.7 | 1.7 | 14.5 | 9.4  | 6.7  | 11.0 | 32.6 | 35.6 | 4.4 |
| IT290614 | KOR | -     | 12.35 | 8.9  | 2.1  | -   | 5.6 | 12.1 | 9.3  | 8.1  | 6.4  | 43.0 | 17.1 | 0.9 |
| IT290615 | KOR | 6.87  | 6.56  | 20.0 | 15.2 | 2.5 | 1.3 | 9.5  | 8.3  | 12.1 | 16.7 | 58.0 | 37.7 | 3.5 |
| IT290616 | KOR | 1.02  | 7.23  | 24.6 | 23.4 | -   | 1.8 | 15.2 | 7.4  | 12.2 | 14.4 | 45.3 | 45.8 | 3.4 |
| IT290617 | KOR | 1.36  | 9.61  | 17.6 | 5.2  | 2.3 | 4.8 | 9.6  | 9.4  | 6.6  | 5.6  | 40.2 | 18.4 | 1.7 |
| IT290618 | KOR | 3.07  | 7.52  | 16.5 | 22.0 | 2.6 | 1.2 | 13.8 | 8.2  | 8.3  | 14.6 | 49.7 | 53.8 | 4.7 |
| IT290619 | KOR | 2.53  | 2.80  | 16.4 | 9.6  | 1.5 | 1.7 | 12.6 | 9.9  | 7.4  | 10.7 | 50.7 | 42.4 | 8.1 |
| IT290620 | KOR | -     | 5.68  | 13.5 | 18.8 | -   | 1.3 | 10.3 | 4.9  | 6.8  | 13.4 | 54.8 | 49.2 | 6.0 |
| IT290621 | KOR | 7.12  | 5.22  | 19.2 | 15.4 | 1.8 | 1.7 | 12.5 | 6.9  | 13.0 | 15.6 | 52.9 | 41.0 | 3.6 |
| IT290622 | KOR | 2.03  | 1.77  | 22.3 | 13.3 | 0.8 | 2.4 | 11.3 | 7.3  | 8.3  | 9.9  | 49.0 | 36.4 | 3.2 |
| IT290623 | KOR | 0.90  | 3.34  | 21.4 | 19.3 | -   | 0.6 | 15.4 | 9.1  | 7.2  | 11.2 | 56.6 | 61.9 | 3.8 |
| IT290624 | KOR | 5.38  | 3.21  | 16.9 | 14.8 | 1.0 | 2.4 | 7.7  | 5.8  | 9.0  | 17.0 | 38.5 | 34.5 | 5.4 |
| IT290625 | KOR | 3.39  | 6.53  | 17.6 | 27.7 | 1.1 | 1.6 | 17.2 | 9.3  | 12.8 | 24.0 | 59.2 | 61.3 | 8.6 |
| IT290626 | KOR | 0.93  | 4.89  | 19.5 | 24.9 | 1.0 | 3.3 | 14.0 | 5.9  | 12.2 | 21.5 | 72.6 | 67.5 | 2.3 |
| IT290627 | KOR | 0.98  | 3.54  | 21.4 | 7.2  | -   | 3.1 | 7.3  | 4.1  | 7.6  | 7.6  | 47.3 | 32.6 | 2.6 |
| IT290628 | KOR | 1.25  | 9.26  | 15.7 | 9.0  | -   | 1.3 | 15.7 | 11.8 | 13.8 | 10.1 | 41.3 | 24.3 | 4.9 |



|          |     |       |       |      |      |     |      |      |      |      |      |      |      |     |
|----------|-----|-------|-------|------|------|-----|------|------|------|------|------|------|------|-----|
| IT290629 | KOR | 1.08  | 3.93  | 19.6 | 15.9 | -   | 2.1  | 7.6  | 7.0  | 7.8  | 15.7 | 46.7 | 38.7 | 3.6 |
| IT290630 | KOR | 2.34  | 9.44  | 12.2 | 2.3  | 1.3 | 2.7  | 9.5  | 8.4  | 7.5  | 4.7  | 31.9 | 15.2 | 1.0 |
| IT290631 | KOR | 2.15  | 2.35  | 24.9 | 14.2 | 0.4 | 3.5  | 13.3 | 5.7  | 10.0 | 12.1 | 66.2 | 50.8 | 2.8 |
| IT290632 | KOR | -     | 4.96  | 20.3 | 10.0 | 0.3 | 1.9  | 10.1 | 8.6  | 5.1  | 7.3  | 35.7 | 37.6 | 7.1 |
| IT290633 | KOR | 1.01  | 1.70  | 25.5 | 21.4 | 1.2 | 1.9  | 10.8 | 4.5  | 12.3 | 15.7 | 76.3 | 59.2 | 2.4 |
| IT290634 | KOR | 9.97  | 2.20  | 19.7 | 16.2 | 0.9 | 3.6  | 8.7  | 4.9  | 9.4  | 15.1 | 48.5 | 50.2 | 2.3 |
| IT290635 | KOR | -     | 5.07  | 25.1 | 17.1 | 1.0 | 3.0  | 11.3 | 7.2  | 6.7  | 13.4 | 54.6 | 50.4 | 1.8 |
| IT290636 | KOR | 2.32  | 4.04  | 20.6 | 14.9 | 2.2 | 2.4  | 13.5 | 12.2 | 12.5 | 20.0 | 57.2 | 54.1 | 2.1 |
| IT290637 | KOR | 1.30  | 2.34  | 16.5 | 13.0 | -   | 1.1  | 16.4 | 13.4 | 9.3  | 12.5 | 41.0 | 44.1 | 1.9 |
| IT290638 | KOR | 1.86  | 2.00  | 16.1 | 12.9 | 0.3 | 1.3  | 12.0 | 7.4  | 7.7  | 11.5 | 37.0 | 41.6 | 3.0 |
| IT290639 | KOR | 2.31  | 1.65  | 18.5 | 18.1 | -   | 1.5  | 11.6 | 5.3  | 11.0 | 18.1 | 48.6 | 48.1 | 3.2 |
| IT290640 | KOR | -     | 5.02  | 13.0 | 9.6  | 0.6 | 1.9  | 14.0 | 13.2 | 7.6  | 9.1  | 29.5 | 28.9 | 5.5 |
| IT290641 | KOR | -     | 1.93  | 24.4 | 4.9  | -   | 6.9  | 8.9  | 8.3  | 7.8  | 7.1  | 40.9 | 19.6 | 1.3 |
| IT290642 | KOR | 2.48  | 2.77  | 14.2 | 16.3 | 4.4 | 1.8  | 10.0 | 4.4  | 9.6  | 16.1 | 50.0 | 52.9 | 1.8 |
| IT290643 | KOR | 3.85  | 1.61  | 18.0 | 13.0 | 0.2 | 1.7  | 8.8  | 4.8  | 5.0  | 9.0  | 36.4 | 39.2 | 2.3 |
| IT290645 | KOR | 1.02  | 3.73  | 21.7 | 17.0 | -   | 3.6  | 14.9 | 11.0 | 10.6 | 15.2 | 58.1 | 59.5 | 3.9 |
| IT290646 | KOR | 1.04  | 3.03  | 14.3 | 14.1 | 0.7 | 2.5  | 8.2  | 5.1  | 9.3  | 13.9 | 50.0 | 50.2 | 2.0 |
| IT290647 | KOR | 2.17  | 5.04  | 16.3 | 22.9 | -   | 2.0  | 12.1 | 11.1 | 13.0 | 18.9 | 47.4 | 45.2 | 1.8 |
| IT290648 | KOR | 5.01  | 4.91  | 19.8 | 15.8 | 0.5 | 3.0  | 9.6  | 7.0  | 5.3  | 14.6 | 57.6 | 57.9 | 3.0 |
| IT290649 | KOR | -     | 5.15  | 20.4 | 1.3  | -   | 21.8 | 8.6  | 3.3  | 5.3  | 3.2  | 46.5 | 16.1 | 3.4 |
| IT290650 | KOR | 1.32  | 4.77  | 23.4 | 25.6 | 4.1 | 1.7  | 11.5 | 5.8  | 11.8 | 20.3 | 64.9 | 69.9 | 1.8 |
| IT290651 | KOR | 16.39 | 1.40  | 3.3  | 14.0 | 1.4 | -    | 7.8  | 7.0  | 5.3  | 14.4 | 26.0 | 39.3 | 3.9 |
| IT290652 | KOR | 21.68 | 5.06  | 1.7  | 13.0 | 1.6 | 1.0  | 19.0 | 6.1  | 4.0  | 10.6 | 16.5 | 42.5 | 2.6 |
| IT290653 | KOR | 9.37  | 4.89  | 14.9 | 20.4 | -   | 2.0  | 12.9 | 6.1  | 9.0  | 14.1 | 32.3 | 45.1 | 3.0 |
| IT290654 | KOR | 1.19  | 4.39  | 25.0 | 22.7 | 1.5 | 2.2  | 9.7  | 4.5  | 6.7  | 13.6 | 62.3 | 65.9 | 3.6 |
| IT290655 | KOR | 2.08  | 2.05  | 14.4 | 15.8 | 1.6 | 1.4  | 8.7  | 7.6  | 8.0  | 13.4 | 45.7 | 46.6 | 1.8 |
| IT290656 | KOR | 4.90  | 6.02  | 18.7 | 19.2 | 0.6 | 1.7  | 10.1 | 6.4  | 8.6  | 18.1 | 51.2 | 47.8 | 2.2 |
| IT290657 | KOR | 0.90  | 4.52  | 16.1 | 19.1 | -   | 1.3  | 10.7 | 6.1  | 9.6  | 15.5 | 45.3 | 49.4 | 7.0 |
| IT290658 | KOR | -     | 5.93  | 18.4 | 21.7 | 0.3 | 1.6  | 20.9 | 7.1  | 9.9  | 13.5 | 42.7 | 52.4 | 4.3 |
| IT290659 | KOR | 1.45  | 1.63  | 18.2 | 11.4 | 0.9 | 2.1  | 13.3 | 7.4  | 7.8  | 10.1 | 56.1 | 39.3 | 2.5 |
| IT290660 | KOR | 0.88  | 7.88  | 20.9 | 19.5 | -   | 2.5  | 14.5 | 8.0  | 12.9 | 21.2 | 65.7 | 66.7 | 2.0 |
| IT290661 | KOR | 3.26  | 2.49  | 18.6 | 16.3 | 0.8 | 1.4  | 12.8 | 7.2  | 13.1 | 12.2 | 50.8 | 38.2 | 1.7 |
| IT290662 | KOR | -     | 5.50  | 17.4 | 14.9 | 0.2 | 1.4  | 11.4 | 7.7  | 7.2  | 11.5 | 42.3 | 45.4 | 7.3 |
| IT290663 | KOR | 0.73  | 2.39  | 14.9 | 15.3 | 0.3 | 1.1  | 12.8 | 8.1  | 7.9  | 12.3 | 51.7 | 57.3 | 1.1 |
| IT290664 | KOR | 2.11  | 3.16  | 27.1 | 26.0 | -   | 1.6  | 11.6 | 12.5 | 7.9  | 12.1 | 56.7 | 55.1 | 4.1 |
| IT290665 | KOR | -     | 2.77  | 22.1 | 16.2 | 0.2 | 2.9  | 12.2 | 8.9  | 8.6  | 12.6 | 50.3 | 49.2 | 2.4 |
| IT290666 | KOR | 8.45  | 6.90  | 12.1 | 14.9 | 1.5 | -    | 11.9 | 5.4  | 7.2  | 13.7 | 29.6 | 40.7 | 4.1 |
| IT290667 | KOR | 2.13  | 6.50  | 23.2 | 18.2 | -   | 1.3  | 13.7 | 5.4  | 16.4 | 17.9 | 41.0 | 49.8 | 2.8 |
| IT290668 | KOR | -     | 6.00  | 14.0 | 6.8  | 2.5 | 3.5  | 12.1 | 12.1 | 7.2  | 12.7 | 51.5 | 48.8 | 2.2 |
| IT290669 | KOR | 1.62  | 5.90  | 18.8 | 20.4 | 1.4 | 1.5  | 16.0 | 12.6 | 9.9  | 14.7 | 48.3 | 53.3 | 3.5 |
| IT290670 | KOR | 2.18  | 4.07  | 20.9 | 19.0 | 0.6 | 2.3  | 8.3  | 7.4  | 9.8  | 15.7 | 61.1 | 61.5 | 2.2 |
| IT290671 | KOR | 0.81  | 1.50  | 15.6 | 14.0 | 0.5 | 1.5  | 9.1  | 6.9  | 7.8  | 10.8 | 52.0 | 63.2 | 6.3 |
| IT290672 | KOR | 2.47  | 3.45  | 14.0 | 13.1 | 1.7 | 1.0  | 13.0 | 12.5 | 6.8  | 12.1 | 31.0 | 36.8 | 8.5 |
| IT290673 | KOR | -     | 3.69  | 25.9 | 16.5 | -   | 1.7  | 16.2 | 6.6  | 11.6 | 13.9 | 55.8 | 38.5 | 4.3 |
| IT290674 | KOR | 2.07  | 4.39  | 32.6 | 18.6 | 2.7 | 1.4  | 10.9 | 4.5  | 15.9 | 17.2 | 74.4 | 51.6 | 1.7 |
| IT290675 | KOR | 0.83  | 2.15  | 18.7 | 19.1 | 1.3 | 2.5  | 12.4 | 7.9  | 10.3 | 14.8 | 42.7 | 48.5 | 1.2 |
| IT290677 | KOR | -     | 3.92  | 19.8 | 18.2 | -   | 1.6  | 7.2  | 6.0  | 6.2  | 8.9  | 45.4 | 48.2 | 2.6 |
| IT290678 | KOR | 5.30  | 10.45 | 17.7 | 7.5  | -   | 2.6  | 7.1  | 15.5 | 6.6  | 9.2  | 40.7 | 29.4 | 2.6 |
| IT290679 | KOR | 2.08  | 6.35  | 14.5 | 6.1  | 1.7 | 3.0  | 13.0 | 10.2 | 4.9  | 6.9  | 26.1 | 26.9 | 3.2 |
| IT290680 | KOR | 7.30  | 4.61  | 19.5 | 13.1 | 1.7 | 2.6  | 9.2  | 7.9  | 8.4  | 16.4 | 43.6 | 48.3 | 2.9 |



|          |     |       |       |      |      |     |     |      |      |      |      |      |      |      |
|----------|-----|-------|-------|------|------|-----|-----|------|------|------|------|------|------|------|
| IT290681 | KOR | -     | 3.65  | 27.6 | 24.7 | 2.1 | 1.5 | 13.2 | 9.1  | 11.5 | 16.8 | 49.7 | 59.7 | 6.0  |
| IT290682 | KOR | -     | 3.31  | 19.0 | 18.3 | 0.6 | 2.0 | 12.4 | 7.0  | 8.0  | 14.3 | 60.8 | 67.8 | 1.9  |
| IT290683 | KOR | -     | 3.75  | 16.3 | 10.7 | 0.2 | 1.8 | 5.1  | 7.0  | 4.5  | 8.4  | 39.6 | 32.8 | 2.1  |
| IT290684 | KOR | 1.13  | 2.85  | 18.8 | 23.7 | 0.3 | 3.2 | 9.5  | 6.9  | 9.8  | 16.7 | 68.3 | 74.3 | 3.5  |
| IT290685 | KOR | 1.84  | 3.20  | 18.2 | 16.8 | -   | -   | 12.7 | 8.7  | 11.2 | 25.4 | 43.6 | 42.1 | 4.9  |
| IT290686 | KOR | 2.31  | 6.19  | 11.5 | 11.3 | 2.3 | 4.8 | 11.1 | 8.5  | 5.2  | 7.2  | 36.6 | 39.3 | 3.1  |
| IT290687 | KOR | 1.27  | 3.20  | 26.6 | 21.3 | -   | 2.6 | 9.9  | 5.1  | 9.1  | 14.4 | 71.5 | 81.7 | 2.5  |
| IT290688 | KOR | 2.91  | 4.31  | 13.6 | 13.6 | 1.4 | 2.2 | 7.9  | 4.9  | 7.3  | 13.3 | 48.0 | 51.9 | 3.7  |
| IT290689 | KOR | -     | 2.99  | 11.4 | 19.0 | 1.3 | 0.9 | 10.2 | 11.4 | 9.2  | 14.7 | 37.8 | 48.1 | 13.7 |
| IT290690 | KOR | 1.13  | 2.85  | 12.8 | 14.5 | 1.1 | 2.1 | 17.6 | 8.4  | 8.6  | 13.5 | 26.6 | 32.6 | 1.3  |
| IT290691 | KOR | 1.54  | 3.39  | 26.1 | 17.2 | 0.2 | 2.3 | 9.0  | 5.7  | 8.1  | 12.9 | 57.8 | 64.8 | 2.5  |
| IT290692 | KOR | 2.59  | 3.53  | 25.6 | 20.6 | 0.3 | 1.8 | 10.4 | 6.8  | 11.5 | 20.0 | 63.8 | 69.9 | 1.9  |
| IT290693 | KOR | 2.91  | 4.48  | 13.2 | 15.4 | 1.2 | 2.3 | 15.3 | 4.7  | 8.4  | 13.9 | 27.7 | 43.4 | 6.0  |
| IT290694 | KOR | -     | 4.13  | 22.5 | 21.1 | 2.3 | 2.4 | 13.5 | 10.0 | 10.7 | 15.7 | 59.3 | 67.7 | 2.8  |
| IT290695 | KOR | 2.58  | 5.70  | 20.4 | 9.4  | 1.2 | 4.2 | 12.6 | 7.4  | 16.0 | 16.1 | 68.7 | 43.9 | 2.8  |
| IT290696 | KOR | 1.28  | 4.80  | 14.7 | 11.7 | 1.8 | 2.4 | 10.7 | 17.2 | 6.3  | 9.0  | 39.8 | 37.1 | 2.6  |
| IT290697 | KOR | 16.12 | 1.80  | 3.5  | 11.1 | 2.5 | 3.1 | 10.4 | 5.0  | 4.2  | 11.5 | 26.6 | 49.4 | 3.5  |
| IT290698 | KOR | 0.32  | 3.76  | 16.1 | 18.6 | 0.4 | 3.4 | 8.8  | 5.5  | 10.6 | 16.9 | 55.1 | 57.8 | 1.5  |
| IT290699 | KOR | 1.13  | 3.29  | 13.7 | 14.3 | 0.5 | 4.8 | 8.4  | 6.7  | 7.6  | 15.4 | 49.4 | 46.4 | 1.3  |
| IT290700 | KOR | 0.89  | 2.27  | 16.0 | 16.5 | 2.2 | 0.8 | 12.1 | 10.9 | 10.4 | 17.5 | 57.0 | 68.9 | 3.4  |
| IT290701 | KOR | 2.81  | 4.82  | 18.6 | 10.3 | 2.8 | 1.7 | 11.8 | 5.9  | 10.0 | 12.1 | 70.7 | 48.6 | 2.5  |
| IT290702 | KOR | -     | 7.06  | 20.2 | 22.7 | 1.9 | 1.5 | 13.0 | 9.0  | 9.5  | 15.9 | 42.3 | 52.9 | 9.2  |
| IT290703 | KOR | 5.68  | 3.50  | 27.4 | 13.0 | 1.6 | 2.7 | 12.6 | 7.0  | 9.6  | 11.3 | 60.8 | 41.8 | 3.9  |
| IT290704 | KOR | -     | 1.43  | 11.3 | 11.8 | 0.7 | 0.9 | 9.8  | 6.7  | 4.3  | 8.1  | 34.5 | 40.4 | 2.6  |
| IT290705 | KOR | 1.45  | 11.33 | 10.6 | 11.5 | -   | 1.6 | 7.8  | 9.5  | 7.3  | 10.9 | 42.2 | 35.2 | 4.1  |
| IT290706 | KOR | 2.34  | 17.50 | 16.7 | 3.2  | 0.3 | 8.1 | 7.0  | 7.5  | 5.0  | 4.7  | 41.8 | 26.6 | 2.2  |
| IT290707 | KOR | 2.48  | 3.31  | 20.0 | 17.3 | 0.9 | 1.1 | 10.9 | 6.8  | 7.8  | 15.4 | 42.5 | 50.3 | 4.3  |
| IT290708 | KOR | 5.27  | 6.31  | 17.3 | 22.4 | 4.5 | 0.0 | 10.6 | 6.6  | 9.8  | 16.5 | 50.5 | 66.2 | 2.9  |
| IT290709 | KOR | 2.09  | 5.40  | 18.9 | 17.0 | 0.3 | 2.2 | 10.6 | 4.5  | 13.5 | 25.6 | 63.6 | 72.1 | 3.4  |
| IT290710 | KOR | 1.17  | 6.23  | 7.0  | 10.9 | 2.0 | 2.8 | 5.8  | 9.6  | 7.7  | 11.5 | 35.3 | 29.5 | 2.6  |
| IT290711 | KOR | 3.05  | 3.39  | 20.8 | 15.6 | 2.9 | 0.0 | 14.0 | 9.9  | 11.2 | 18.9 | 57.1 | 73.2 | 2.4  |
| IT290712 | KOR | 6.36  | 2.29  | 21.3 | 14.6 | 3.0 | 2.5 | 5.3  | 3.0  | 15.8 | 16.6 | 75.0 | 51.1 | 3.0  |
| IT290713 | KOR | -     | 1.83  | 23.7 | 11.7 | -   | 1.4 | 16.4 | 15.2 | 9.3  | 9.4  | 60.0 | 36.5 | 3.7  |
| IT290714 | KOR | 1.81  | 4.90  | 17.7 | 20.2 | -   | 1.9 | 11.5 | 8.2  | 10.7 | 12.7 | 47.3 | 54.7 | 1.7  |
| IT290715 | KOR | 0.75  | 19.13 | 22.9 | 12.1 | 0.8 | 1.8 | 8.6  | 3.3  | 4.7  | 8.5  | 38.1 | 34.6 | 6.0  |
| IT290716 | KOR | 3.76  | 8.43  | 15.2 | 18.1 | 1.7 | 2.4 | 12.7 | 6.8  | 12.0 | 19.3 | 50.7 | 60.4 | 3.3  |
| IT290717 | KOR | 2.06  | 5.86  | 13.6 | 19.5 | 1.4 | 2.1 | 12.0 | 7.6  | 8.8  | 17.5 | 62.6 | 70.3 | 3.9  |
| IT290718 | KOR | 1.20  | 3.25  | 19.8 | 13.4 | 3.6 | 3.8 | 10.4 | 12.9 | 5.6  | 13.7 | 41.0 | 39.3 | 2.1  |
| IT290719 | KOR | 2.06  | 1.83  | 11.0 | 15.2 | -   | 3.2 | 8.7  | 5.7  | 8.6  | 14.1 | 46.2 | 51.2 | 1.9  |
| IT290720 | KOR | -     | 11.43 | 17.8 | 17.7 | 1.2 | 0.7 | 17.1 | 7.4  | 8.8  | 16.2 | 35.3 | 39.9 | 3.3  |
| IT290721 | KOR | 4.48  | 2.41  | 21.6 | 21.0 | 0.3 | 2.0 | 11.5 | 5.1  | 12.3 | 22.1 | 58.4 | 74.5 | 2.8  |
| IT290722 | KOR | 2.25  | 5.06  | 22.7 | 20.5 | 1.4 | 2.5 | 10.2 | 8.3  | 9.1  | 17.4 | 45.0 | 53.0 | 5.4  |
| IT290723 | KOR | 1.23  | 3.87  | 14.7 | 15.4 | 1.4 | 0.8 | 10.6 | 10.0 | 11.9 | 19.4 | 35.7 | 37.1 | 1.1  |
| IT290724 | KOR | -     | 6.71  | 16.7 | 2.1  | 0.2 | 1.6 | 9.2  | 7.2  | 4.9  | 3.2  | 41.0 | 18.7 | 1.5  |
| IT290726 | KOR | -     | 10.12 | 10.8 | 13.9 | 1.0 | 2.0 | 10.4 | 10.5 | 10.6 | 17.9 | 45.8 | 44.5 | 6.4  |
| IT290727 | KOR | -     | 1.63  | 16.9 | 12.9 | 0.9 | -   | 8.8  | 4.9  | 3.5  | 6.8  | 32.6 | 37.7 | 1.1  |
| IT290728 | KOR | -     | 4.89  | 18.4 | 16.4 | 2.9 | 2.5 | 9.4  | 8.4  | 5.9  | 12.5 | 47.2 | 48.0 | 1.9  |
| IT290729 | KOR | 1.49  | 1.77  | 19.9 | 9.7  | 0.6 | 1.9 | 15.2 | 9.5  | 9.2  | 9.0  | 38.4 | 23.6 | 3.6  |
| IT290730 | KOR | 7.47  | 6.30  | 13.3 | 13.0 | -   | 2.6 | 8.1  | 7.8  | 7.5  | 13.9 | 36.9 | 42.4 | 2.9  |
| IT290731 | KOR | 2.40  | 4.52  | 15.7 | 20.0 | 1.8 | 1.5 | 10.2 | 12.6 | 7.6  | 13.4 | 40.4 | 42.8 | 1.5  |



|          |     |      |      |      |      |     |     |      |      |      |      |      |      |     |
|----------|-----|------|------|------|------|-----|-----|------|------|------|------|------|------|-----|
| IT290732 | KOR | 1.91 | 2.64 | 23.1 | 20.0 | 0.9 | 2.6 | 11.5 | 9.2  | 11.5 | 21.3 | 69.3 | 84.3 | 1.9 |
| IT290733 | KOR | -    | 3.18 | 16.7 | 12.0 | -   | 2.8 | 8.4  | 2.9  | 4.4  | 10.9 | 33.3 | 35.8 | 2.5 |
| IT290734 | KOR | 1.68 | 1.39 | 21.5 | 5.4  | 0.2 | 2.1 | 12.0 | 9.4  | 7.3  | 8.1  | 47.3 | 24.6 | 2.0 |
| IT290735 | KOR | 1.49 | 6.88 | 19.4 | 8.9  | 0.4 | 4.7 | 7.9  | 6.5  | 5.8  | 9.9  | 32.6 | 31.3 | 2.9 |
| IT290736 | KOR | 2.72 | 2.95 | 19.9 | 14.3 | 2.2 | 1.9 | 7.6  | 5.1  | 3.9  | 9.9  | 29.6 | 34.8 | 2.8 |
| IT290737 | KOR | 4.81 | 4.68 | 29.3 | 14.9 | 1.8 | 2.3 | 11.7 | 8.2  | 13.5 | 14.7 | 75.0 | 46.6 | 5.6 |
| IT290738 | KOR | 1.08 | 2.75 | 21.9 | 22.7 | 0.4 | 1.8 | 10.1 | 6.9  | 9.8  | 14.0 | 54.6 | 65.9 | 3.7 |
| IT290740 | KOR | 1.35 | 3.91 | 18.2 | 22.2 | 0.5 | 1.3 | 9.0  | 5.4  | 9.9  | 15.5 | 51.5 | 60.3 | 2.9 |
| IT290741 | KOR | 1.44 | 6.97 | 20.8 | 15.5 | -   | 2.5 | 7.2  | 5.8  | 5.5  | 13.5 | 44.2 | 42.8 | 2.8 |
| IT290742 | KOR | 2.51 | 2.22 | 27.7 | 20.4 | 1.5 | 1.6 | 11.0 | 6.6  | 11.3 | 21.6 | 66.5 | 82.7 | 3.0 |
| IT290743 | KOR | 1.00 | 1.26 | 15.2 | 16.3 | 1.1 | 1.9 | 10.2 | 8.1  | 6.0  | 10.2 | 50.3 | 61.3 | 2.1 |
| IT290744 | KOR | 1.18 | 3.48 | 15.9 | 12.7 | 0.5 | 1.2 | 9.6  | 6.4  | 12.1 | 15.9 | 40.6 | 50.6 | 1.6 |
| IT290745 | KOR | 1.39 | 3.89 | 32.0 | 24.5 | -   | 3.6 | 5.8  | 2.5  | 9.9  | 18.2 | 75.6 | 91.1 | 3.8 |
| IT290746 | KOR | 0.56 | 2.45 | 16.2 | 14.6 | -   | 1.7 | 8.6  | 5.9  | 7.7  | 13.1 | 47.7 | 57.2 | 3.6 |
| IT290747 | KOR | 2.16 | 4.84 | 16.8 | 14.0 | 0.9 | 1.8 | 8.3  | 5.9  | 4.3  | 8.3  | 31.5 | 35.7 | 2.0 |
| IT290748 | KOR | 1.42 | 4.40 | 19.9 | 19.0 | 0.3 | 2.7 | 9.0  | 6.5  | 6.7  | 15.7 | 52.3 | 55.4 | 1.3 |
| IT290749 | KOR | 2.22 | 2.75 | 29.4 | 22.3 | 0.4 | 2.8 | 10.5 | 7.0  | 8.5  | 16.9 | 58.0 | 66.1 | 1.6 |
| IT290750 | KOR | 1.87 | 4.94 | 15.7 | 15.5 | 1.2 | 1.6 | 13.8 | 7.5  | 7.5  | 13.7 | 33.3 | 40.8 | 2.3 |
| IT290751 | KOR | 3.47 | 3.49 | 30.0 | 23.4 | 0.5 | 2.7 | 11.5 | 6.3  | 13.4 | 27.5 | 66.5 | 81.9 | 3.5 |
| IT290752 | KOR | 6.62 | 1.61 | 24.1 | 17.3 | 0.7 | 4.6 | 9.1  | 7.5  | 10.2 | 19.8 | 55.8 | 72.0 | 2.6 |
| IT290753 | KOR | 2.90 | 2.17 | 13.9 | 14.0 | 2.7 | 1.5 | 14.0 | 10.4 | 7.2  | 13.2 | 36.8 | 49.9 | 1.2 |
| IT290754 | KOR | 1.87 | 2.67 | 14.5 | 13.8 | 0.8 | 1.0 | 8.7  | 7.7  | 5.1  | 9.4  | 36.5 | 46.8 | 4.1 |
| IT290755 | KOR | 1.71 | 7.56 | 19.8 | 23.0 | 0.8 | 1.5 | 10.0 | 6.4  | 10.2 | 15.9 | 53.7 | 67.8 | 5.4 |
| IT290756 | KOR | -    | 3.17 | 16.5 | 10.8 | 1.5 | 2.3 | 7.8  | 13.1 | 4.5  | 8.3  | 35.2 | 32.3 | 1.7 |
| IT290757 | KOR | 1.74 | 6.02 | 17.2 | 14.5 | 0.2 | 1.6 | 6.1  | 3.5  | 6.8  | 11.4 | 52.7 | 61.1 | 1.4 |
| IT290758 | KOR | 7.72 | 2.87 | 14.9 | 17.4 | 1.3 | 3.5 | 4.3  | 3.1  | 6.7  | 15.0 | 57.6 | 71.4 | 1.6 |
| IT290759 | KOR | 1.80 | 1.50 | 23.3 | 8.6  | 0.3 | 3.9 | 15.1 | 5.6  | 6.6  | 6.9  | 44.7 | 27.7 | 2.5 |
| IT290760 | KOR | 1.68 | 3.78 | 15.9 | 15.3 | -   | 2.4 | 10.0 | 8.0  | 5.6  | 10.9 | 36.8 | 44.3 | 4.4 |
| IT290761 | KOR | 0.73 | 9.18 | 16.9 | 7.0  | 0.2 | 5.2 | 7.3  | 12.1 | 5.0  | 8.4  | 38.0 | 30.8 | 3.1 |
| IT290762 | KOR | 1.31 | 3.96 | 18.3 | 14.0 | 1.8 | 2.1 | 11.1 | 11.3 | 9.9  | 14.0 | 23.1 | 32.8 | 6.9 |
| IT290763 | KOR | 1.30 | 1.46 | 21.6 | 10.6 | 3.3 | 2.0 | 8.0  | 3.3  | 8.1  | 8.7  | 47.7 | 30.6 | 5.1 |
| IT290764 | KOR | 1.23 | 2.58 | 28.9 | 22.0 | 1.2 | 1.4 | 9.0  | 6.3  | 7.6  | 16.0 | 53.7 | 64.8 | 2.9 |
| IT290765 | KOR | 2.82 | 3.82 | 15.4 | 16.5 | 0.9 | 1.9 | 6.2  | 4.1  | 12.9 | 22.1 | 69.5 | 86.5 | 1.3 |
| IT290766 | KOR | 2.60 | 2.18 | 27.0 | 8.0  | 1.5 | 3.5 | 8.6  | 9.9  | 8.8  | 8.1  | 72.9 | 41.0 | 2.1 |
| IT290767 | KOR | -    | 2.17 | 16.0 | 12.6 | 1.3 | 2.9 | 12.0 | 10.3 | 6.2  | 15.0 | 34.5 | 38.5 | 1.6 |
| IT290768 | KOR | 2.73 | 3.60 | 14.2 | 15.1 | 2.1 | 1.8 | 12.1 | 9.1  | 13.0 | 23.8 | 47.7 | 61.2 | 1.9 |
| IT290769 | KOR | 5.14 | 2.22 | 23.6 | 19.5 | 3.2 | 3.3 | 11.7 | 12.0 | 14.6 | 27.6 | 61.5 | 76.5 | 1.9 |
| IT290770 | KOR | 1.68 | 6.23 | 15.6 | 17.4 | 0.7 | 1.9 | 13.4 | 12.1 | 10.0 | 17.7 | 41.8 | 49.4 | 3.0 |
| IT290771 | KOR | 1.94 | 2.90 | 16.4 | 13.4 | 2.6 | 2.1 | 10.2 | 9.2  | 6.9  | 14.7 | 44.9 | 57.5 | 3.8 |
| IT290772 | KOR | 2.37 | 2.77 | 25.2 | 23.5 | -   | 3.8 | 9.6  | 4.9  | 10.6 | 18.9 | 70.6 | 91.3 | 2.5 |
| IT290773 | KOR | 4.66 | 3.90 | 15.3 | 16.8 | 2.0 | 0.9 | 9.4  | 8.7  | 11.5 | 21.7 | 45.6 | 65.4 | 8.3 |
| IT290774 | KOR | 1.50 | 3.44 | 16.4 | 16.2 | -   | 1.0 | 8.7  | 8.1  | 10.0 | 16.1 | 39.8 | 47.4 | 2.4 |
| IT290775 | KOR | 0.88 | 1.60 | 12.8 | 14.9 | -   | 1.2 | 8.0  | 5.5  | 3.9  | 8.1  | 30.5 | 38.3 | 3.1 |
| IT290776 | KOR | 0.74 | 4.74 | 14.7 | 10.5 | -   | 2.3 | 8.7  | 7.3  | 6.0  | 14.0 | 35.3 | 36.7 | 3.2 |
| IT290777 | KOR | 1.18 | 6.11 | 12.4 | 24.0 | 0.9 | 1.4 | 12.4 | 5.5  | 7.6  | 15.8 | 43.9 | 54.2 | 2.5 |
| IT290778 | KOR | 0.66 | 3.05 | 27.3 | 24.6 | 0.4 | 2.6 | 8.2  | 3.5  | 6.8  | 13.6 | 52.4 | 59.9 | 3.1 |
| IT290779 | KOR | 1.75 | 4.18 | 26.8 | 22.9 | 0.3 | 3.7 | 14.3 | 7.1  | 7.7  | 15.2 | 46.9 | 56.9 | 2.6 |
| IT290780 | KOR | 0.95 | 2.07 | 14.4 | 15.4 | -   | 2.5 | 8.4  | 7.9  | 7.4  | 12.5 | 47.0 | 58.5 | 1.1 |
| IT290781 | KOR | 4.01 | 7.46 | 18.4 | 19.0 | 1.5 | 2.2 | 9.3  | 7.1  | 7.6  | 17.3 | 49.2 | 55.5 | 3.3 |
| IT290782 | KOR | 0.85 | 2.00 | 14.2 | 15.9 | 1.7 | 3.9 | 8.2  | 7.4  | 7.4  | 12.9 | 44.4 | 52.0 | 0.7 |



|          |     |      |       |      |      |     |      |      |      |      |      |      |      |      |
|----------|-----|------|-------|------|------|-----|------|------|------|------|------|------|------|------|
| IT290783 | KOR | 1.91 | 4.43  | 16.9 | 17.9 | -   | 1.9  | 11.5 | 6.7  | 9.9  | 18.6 | 49.7 | 64.1 | 2.8  |
| IT290784 | KOR | 2.50 | 3.07  | 8.0  | 20.3 | 0.9 | 2.0  | 10.0 | 6.5  | 6.9  | 17.2 | 45.0 | 54.4 | 2.3  |
| IT290785 | KOR | 1.33 | 12.78 | 14.5 | 7.5  | 3.0 | 5.2  | 9.8  | 16.8 | 5.4  | 7.2  | 36.7 | 29.3 | 1.9  |
| IT290786 | KOR | 2.51 | 1.84  | 21.8 | 12.5 | 1.7 | 1.0  | 13.0 | 5.0  | 9.1  | 10.4 | 65.2 | 42.3 | 2.0  |
| IT290787 | KOR | 0.68 | 2.89  | 13.6 | 18.3 | 0.3 | 3.8  | 7.7  | 5.2  | 7.2  | 12.0 | 53.5 | 59.7 | 1.2  |
| IT290788 | KOR | 0.49 | 5.78  | 16.0 | 17.3 | -   | 0.9  | 10.4 | 6.2  | 5.8  | 12.9 | 39.0 | 46.9 | 3.2  |
| IT290789 | KOR | 1.73 | 2.94  | 11.1 | 14.9 | 0.3 | 1.6  | 16.7 | 13.8 | 10.3 | 19.1 | 32.9 | 44.2 | 2.9  |
| IT290790 | KOR | -    | 7.77  | 16.3 | 19.8 | 4.3 | 2.4  | 10.4 | 13.6 | 7.8  | 20.3 | 53.0 | 52.6 | 2.8  |
| IT290791 | KOR | 1.11 | 2.82  | 13.2 | 17.2 | 0.9 | 1.6  | 6.3  | 4.7  | 3.7  | 9.8  | 36.2 | 38.6 | 2.7  |
| IT290792 | KOR | -    | 4.67  | 11.5 | 12.5 | -   | 5.8  | 9.5  | 8.4  | 5.6  | 11.4 | 44.6 | 48.9 | 2.8  |
| IT290793 | KOR | 1.55 | 2.44  | 21.9 | 17.6 | 2.6 | 2.2  | 11.4 | 6.7  | 6.8  | 15.3 | 35.7 | 51.0 | 5.4  |
| IT290794 | KOR | 3.11 | 3.61  | 18.6 | 17.4 | 1.5 | 1.1  | 5.3  | 7.0  | 6.8  | 17.3 | 61.4 | 74.7 | 2.4  |
| IT290795 | KOR | 2.54 | 6.02  | 16.2 | 19.6 | 0.9 | 6.2  | 10.1 | 5.4  | 11.5 | 23.5 | 55.6 | 72.5 | 9.2  |
| IT290796 | KOR | 1.37 | 4.54  | 19.4 | 17.4 | 0.7 | 3.6  | 14.1 | 11.3 | 12.3 | 20.0 | 46.3 | 59.1 | 2.4  |
| IT290797 | KOR | 2.19 | 14.90 | 19.0 | 9.5  | -   | 6.7  | 6.7  | 7.9  | 5.8  | 12.8 | 43.2 | 35.6 | 2.8  |
| IT290798 | KOR | 1.84 | 6.27  | 19.9 | 21.4 | 0.2 | 1.0  | 13.2 | 8.7  | 7.7  | 17.5 | 44.8 | 57.1 | 3.0  |
| IT290799 | KOR | -    | 3.73  | 17.3 | 14.8 | 1.3 | 2.4  | 9.8  | 9.3  | 5.5  | 17.5 | 47.3 | 52.6 | 3.8  |
| IT290800 | KOR | 5.88 | 11.96 | 15.9 | 14.5 | 1.0 | 3.6  | 15.1 | 14.1 | 5.7  | 13.1 | 32.6 | 39.3 | 5.0  |
| IT290801 | KOR | 1.07 | 3.29  | 14.6 | 19.4 | 1.8 | 1.1  | 8.8  | 8.2  | 8.8  | 20.0 | 51.2 | 60.9 | 1.6  |
| IT290802 | KOR | 2.35 | 5.09  | 23.5 | 14.7 | 0.4 | 1.2  | 9.1  | 3.9  | 12.2 | 15.6 | 95.9 | 52.4 | 3.6  |
| IT290803 | KOR | -    | 11.87 | 19.0 | 2.8  | 0.7 | 8.4  | 10.8 | 10.8 | 7.0  | 4.6  | 48.6 | 11.5 | 9.4  |
| IT290804 | KOR | 1.04 | 1.76  | 15.6 | 14.2 | 1.8 | 1.9  | 8.0  | 8.1  | 6.3  | 13.9 | 31.4 | 51.7 | 12.4 |
| IT290805 | KOR | 2.07 | 3.49  | 16.5 | 24.3 | -   | 2.5  | 8.5  | 2.6  | 9.1  | 18.1 | 56.8 | 68.2 | 2.7  |
| IT290807 | KOR | 2.17 | 1.45  | 13.9 | 16.5 | -   | 1.5  | 10.4 | 5.9  | 5.6  | 11.0 | 31.3 | 43.1 | 2.5  |
| IT290808 | KOR | 2.31 | 4.16  | 13.9 | 16.6 | 0.9 | 1.2  | 9.9  | 8.4  | 8.5  | 15.6 | 40.5 | 54.9 | 2.0  |
| IT290809 | KOR | -    | 8.46  | 12.6 | 20.6 | 0.2 | 3.8  | 9.5  | 8.9  | 9.4  | 16.6 | 57.5 | 63.8 | 1.6  |
| IT290810 | KOR | -    | 4.52  | 26.2 | 23.9 | -   | 2.5  | 15.4 | 12.0 | 9.7  | 16.6 | 52.7 | 67.4 | 2.0  |
| IT290811 | KOR | 5.40 | 7.59  | 20.0 | 2.8  | 0.2 | 11.7 | 13.2 | 6.9  | 10.5 | 5.9  | 56.8 | 24.3 | 4.2  |
| IT290812 | KOR | -    | 7.08  | 13.7 | 11.3 | 1.3 | 2.2  | 13.7 | 14.8 | 5.4  | 12.5 | 26.8 | 31.7 | 6.8  |
| IT290813 | KOR | 2.25 | 1.79  | 21.2 | 18.8 | 2.4 | 2.8  | 10.2 | 7.0  | 10.2 | 22.2 | 47.6 | 59.4 | 1.5  |
| IT290814 | KOR | -    | 4.47  | 22.9 | 21.7 | 4.0 | 2.3  | 7.0  | 4.2  | 5.4  | 15.3 | 49.7 | 64.0 | 3.0  |
| IT290815 | KOR | 1.78 | 4.29  | 19.8 | 21.2 | 0.7 | 1.6  | 10.8 | 14.3 | 8.0  | 16.6 | 41.1 | 51.9 | 5.8  |
| IT290816 | KOR | 4.09 | 5.12  | 17.0 | 22.1 | 0.8 | 0.3  | 6.6  | 5.9  | 5.0  | 12.3 | 38.8 | 49.6 | 3.1  |
| IT290817 | KOR | 1.60 | 1.72  | 15.0 | 12.5 | 0.2 | 1.6  | 8.0  | 9.5  | 4.0  | 7.9  | 34.3 | 43.1 | 2.2  |
| IT290818 | KOR | 5.68 | 1.59  | 24.5 | 9.7  | 4.3 | 1.7  | 9.6  | 7.9  | 12.3 | 12.0 | 53.3 | 29.2 | 1.5  |
| IT290819 | KOR | -    | 2.39  | 21.1 | 18.0 | 0.7 | 1.8  | 11.6 | 7.9  | 6.1  | 11.3 | 36.8 | 47.0 | 2.2  |
| IT290820 | KOR | 4.00 | 7.33  | 21.6 | 23.8 | 1.8 | 9.8  | 7.2  | 7.3  | 9.3  | 20.9 | 59.4 | 65.5 | 3.1  |
| IT290821 | KOR | 1.20 | 6.60  | 18.6 | 20.3 | -   | 1.7  | 10.7 | 10.4 | 7.5  | 16.5 | 50.1 | 59.5 | 3.0  |
| IT290822 | KOR | -    | 4.67  | 20.9 | 16.9 | 0.9 | 2.2  | 9.8  | 4.6  | 6.1  | 10.5 | 43.5 | 56.1 | 1.3  |
| IT290823 | KOR | 1.85 | 7.15  | 13.0 | 15.6 | 0.3 | 3.0  | 12.3 | 5.0  | 10.1 | 17.3 | 32.7 | 46.0 | 3.2  |
| IT290824 | KOR | 2.52 | 1.46  | 19.9 | 6.0  | -   | 1.6  | 20.3 | 12.6 | 8.1  | 5.7  | 30.5 | 15.7 | 3.2  |
| IT290825 | KOR | 0.94 | 2.74  | 15.6 | 15.8 | 0.2 | 2.0  | 12.6 | 15.4 | 7.5  | 14.3 | 33.6 | 39.5 | 2.3  |
| IT290826 | KOR | 1.88 | 6.71  | 17.1 | 15.5 | 2.4 | 1.1  | 8.3  | 10.0 | 9.7  | 22.4 | 44.1 | 48.3 | 1.3  |
| IT290827 | KOR | 2.42 | 4.75  | 21.2 | 21.7 | 2.3 | 2.2  | 8.1  | 7.0  | 7.5  | 18.9 | 48.1 | 70.7 | 9.9  |
| IT290828 | KOR | 4.01 | 4.65  | 21.8 | 18.2 | 2.1 | 1.2  | 8.2  | 8.4  | 6.5  | 17.2 | 52.1 | 69.1 | 2.9  |
| IT290829 | KOR | -    | 11.89 | 11.5 | 13.1 | 1.3 | 5.6  | 11.7 | 14.1 | 7.0  | 9.4  | 42.8 | 41.5 | 1.9  |
| IT290830 | KOR | 1.17 | 1.79  | 29.6 | 14.7 | -   | 1.6  | 5.8  | 6.6  | 6.7  | 16.0 | 48.2 | 57.6 | 2.4  |
| IT290832 | KOR | 1.24 | 6.68  | 15.2 | 17.4 | 0.5 | 2.7  | 11.2 | 9.1  | 5.6  | 14.4 | 37.1 | 42.7 | 2.0  |
| IT290833 | KOR | -    | 12.12 | 15.2 | 7.5  | 1.5 | 5.2  | 6.4  | 8.4  | 6.1  | 12.2 | 40.3 | 35.9 | 1.4  |
| IT290834 | KOR | 1.33 | 5.10  | 12.7 | 13.1 | 1.4 | 2.1  | 7.4  | 5.9  | 9.2  | 16.8 | 36.8 | 45.8 | 2.9  |



|          |     |       |       |      |      |     |     |      |      |      |      |      |      |      |
|----------|-----|-------|-------|------|------|-----|-----|------|------|------|------|------|------|------|
| IT290835 | KOR | 0.77  | 3.90  | 21.4 | 21.7 | 0.5 | 3.4 | 9.3  | 5.1  | 7.1  | 16.3 | 57.7 | 73.3 | 1.5  |
| IT290836 | KOR | 1.23  | 3.56  | 17.1 | 16.5 | 1.0 | 3.4 | 11.4 | 13.3 | 10.7 | 22.3 | 43.7 | 55.1 | 2.1  |
| IT290837 | KOR | -     | 4.38  | 19.8 | 23.8 | 3.4 | 1.2 | 12.5 | 14.9 | 8.8  | 19.3 | 47.3 | 58.6 | 1.7  |
| IT290838 | KOR | 1.98  | 4.04  | 16.4 | 22.3 | 0.3 | 2.0 | 8.4  | 4.4  | 9.7  | 20.6 | 49.3 | 59.1 | 1.6  |
| IT290840 | KOR | 1.18  | 2.20  | 17.3 | 15.6 | 1.3 | 2.3 | 13.4 | 6.3  | 5.5  | 13.7 | 35.2 | 52.5 | 2.1  |
| IT290841 | KOR | 2.13  | 8.01  | 13.4 | 12.2 | 2.0 | 3.4 | 9.2  | 6.2  | 8.3  | 18.7 | 48.2 | 63.0 | 1.0  |
| IT290842 | KOR | 1.83  | 3.57  | 15.8 | 23.3 | 0.6 | 0.9 | 9.1  | 7.2  | 7.9  | 20.1 | 52.0 | 69.0 | 3.1  |
| IT290843 | KOR | -     | 3.14  | 16.2 | 19.7 | 0.4 | 0.8 | 10.9 | 10.3 | 7.5  | 17.0 | 33.9 | 49.0 | 7.4  |
| IT290844 | KOR | 2.34  | 3.53  | 14.6 | 18.5 | 2.0 | 1.2 | 9.3  | 8.0  | 6.8  | 13.4 | 40.6 | 58.2 | 2.2  |
| IT290845 | KOR | 1.33  | 5.81  | 17.6 | 17.3 | 0.3 | 2.2 | 7.8  | 9.0  | 9.1  | 19.8 | 58.1 | 73.4 | 1.3  |
| IT290846 | KOR | 1.77  | 3.32  | 16.6 | 14.6 | 0.7 | 2.9 | 3.4  | 5.5  | 4.7  | 10.6 | 32.1 | 40.1 | 2.7  |
| IT290847 | KOR | 1.85  | 3.34  | 12.9 | 20.2 | 2.3 | 3.3 | 7.1  | 4.8  | 10.0 | 18.9 | 54.6 | 76.3 | 1.9  |
| IT290848 | KOR | 1.45  | 3.03  | 15.4 | 13.6 | 0.3 | 1.1 | 10.7 | 9.8  | 5.8  | 10.8 | 36.8 | 54.2 | 3.0  |
| IT290849 | KOR | 2.03  | 3.44  | 16.9 | 13.4 | 2.4 | 3.4 | 6.5  | 7.5  | 5.7  | 19.2 | 41.3 | 42.7 | 1.0  |
| IT290850 | KOR | 2.06  | 10.65 | 19.5 | 4.6  | 0.2 | 6.7 | 7.1  | 6.1  | 4.6  | 8.7  | 31.1 | 31.2 | 2.2  |
| IT290851 | KOR | 1.49  | 4.83  | 16.4 | 19.7 | -   | 2.9 | 7.8  | 6.1  | 10.2 | 26.6 | 51.1 | 60.0 | 2.6  |
| IT290852 | KOR | 0.91  | 1.71  | 21.1 | 13.2 | -   | 2.1 | 10.8 | 8.1  | 6.5  | 14.7 | 42.3 | 59.9 | 1.9  |
| IT290853 | KOR | 3.20  | 4.21  | 17.3 | 19.0 | 1.5 | 1.6 | 7.2  | 7.0  | 5.6  | 14.8 | 43.5 | 60.7 | 3.2  |
| IT290854 | KOR | 3.59  | 10.14 | 15.7 | 16.3 | 0.5 | 1.7 | 5.8  | 9.0  | 5.1  | 9.2  | 35.3 | 41.1 | 2.0  |
| IT290857 | KOR | 5.06  | 8.55  | 15.6 | 21.6 | 1.3 | -   | 17.1 | 20.3 | 5.8  | 13.3 | 26.5 | 48.6 | 8.4  |
| IT290858 | KOR | -     | 6.72  | 17.8 | 2.6  | 1.1 | 5.6 | 11.9 | 7.8  | 8.5  | 6.3  | 39.4 | 14.9 | 11.6 |
| IT290859 | KOR | 0.59  | 7.71  | 20.3 | 4.2  | 1.4 | 2.0 | 11.1 | 6.5  | 8.4  | 7.1  | 60.3 | 26.4 | 5.6  |
| IT290860 | KOR | 3.01  | 7.95  | 19.2 | 22.4 | 1.7 | 3.4 | 17.3 | 9.4  | 8.5  | 20.1 | 35.4 | 52.8 | 2.4  |
| IT290861 | KOR | -     | 3.34  | 17.0 | 22.3 | -   | 2.4 | 9.4  | 6.0  | 7.1  | 18.6 | 45.3 | 54.7 | 2.5  |
| IT290862 | KOR | -     | 3.24  | 19.0 | 17.3 | 0.5 | 2.1 | 7.1  | 4.5  | 3.5  | 13.0 | 36.1 | 42.7 | 1.9  |
| IT290863 | KOR | 1.70  | 3.45  | 16.2 | 22.1 | 1.7 | 1.8 | 7.1  | 6.8  | 7.9  | 17.4 | 42.2 | 52.7 | 1.7  |
| IT290864 | KOR | 1.25  | 3.23  | 18.3 | 22.0 | 3.1 | 2.6 | 7.8  | 2.7  | 6.4  | 25.6 | 55.5 | 73.9 | 3.9  |
| IT290865 | KOR | 1.60  | 3.69  | 13.5 | 18.7 | 2.7 | 2.3 | 12.5 | 8.1  | 7.7  | 19.3 | 32.5 | 50.4 | 1.3  |
| IT290866 | KOR | 2.92  | 3.94  | 17.4 | 20.2 | 0.3 | 1.5 | 5.1  | 4.2  | 6.2  | 15.8 | 43.0 | 54.5 | 2.4  |
| IT290867 | KOR | 1.28  | 4.88  | 11.0 | 15.7 | 0.4 | 2.2 | 8.1  | 5.0  | 8.9  | 17.3 | 31.3 | 45.3 | 4.2  |
| IT290868 | KOR | 1.86  | 10.32 | 18.6 | 24.5 | 1.1 | 1.6 | 7.8  | 5.2  | 10.5 | 22.2 | 49.0 | 59.9 | 1.1  |
| IT290869 | KOR | -     | 2.38  | 20.5 | 19.6 | 0.4 | 1.8 | 8.2  | 4.6  | 6.5  | 16.1 | 46.3 | 70.2 | 5.2  |
| IT290870 | KOR | 1.88  | 3.90  | 13.5 | 13.9 | 0.4 | 1.8 | 7.6  | 8.4  | 5.5  | 12.8 | 32.4 | 42.9 | 3.0  |
| IT290871 | KOR | -     | 4.80  | 9.5  | 13.7 | -   | 2.2 | 7.1  | 9.4  | 6.3  | 14.0 | 36.0 | 38.6 | 1.5  |
| IT290872 | KOR | 3.92  | 1.29  | 22.9 | 3.4  | -   | 3.1 | 15.7 | 10.3 | 9.7  | 6.9  | 40.3 | 18.7 | 3.9  |
| IT290873 | KOR | -     | 4.75  | 23.2 | 17.2 | 0.6 | 4.9 | 10.0 | 7.0  | 4.7  | 12.0 | 44.6 | 56.7 | 2.4  |
| IT290874 | KOR | 1.17  | 2.33  | 17.1 | 20.6 | 2.9 | 1.2 | 11.9 | 10.0 | 8.3  | 12.6 | 41.9 | 72.9 | 2.4  |
| IT290875 | KOR | 2.88  | 8.10  | 22.6 | 24.7 | 3.7 | 2.0 | 12.7 | 9.4  | 9.8  | 26.6 | 57.7 | 79.4 | 2.9  |
| IT290876 | KOR | -     | 9.04  | 16.9 | 14.0 | -   | 2.3 | 7.5  | 8.2  | 6.2  | 18.9 | 43.9 | 45.1 | 4.0  |
| IT290877 | KOR | -     | 3.83  | 19.3 | 17.7 | 0.2 | 1.6 | 12.3 | 5.4  | 7.0  | 15.7 | 35.8 | 51.2 | 2.2  |
| IT290878 | KOR | 2.46  | 3.14  | 34.9 | 13.9 | 0.5 | 2.6 | 14.7 | 9.3  | 17.3 | 16.5 | 73.5 | 35.9 | 8.4  |
| IT290879 | KOR | -     | 2.72  | 20.6 | 18.2 | 0.6 | 2.6 | 10.5 | 7.7  | 6.4  | 13.3 | 37.7 | 54.0 | 3.0  |
| IT290880 | KOR | 25.13 | 6.46  | 10.1 | 5.6  | 3.8 | 4.8 | 26.6 | 5.8  | 8.0  | 8.0  | 18.2 | 22.4 | 4.0  |
| IT290881 | KOR | -     | 3.99  | 12.4 | 16.4 | 0.4 | 1.2 | 6.1  | 7.9  | 4.7  | 12.7 | 39.4 | 49.7 | 3.3  |
| IT290882 | KOR | 1.48  | 4.88  | 14.6 | 17.5 | 0.4 | 2.5 | 7.8  | 6.9  | 7.0  | 16.1 | 47.9 | 61.2 | 1.0  |
| IT290883 | KOR | 2.41  | 7.85  | 14.9 | 19.4 | -   | 1.9 | 6.5  | 4.8  | 5.7  | 14.6 | 49.9 | 64.8 | 1.9  |
| IT290884 | KOR | 3.25  | 4.17  | 18.9 | 15.4 | 0.4 | 0.9 | 8.2  | 9.0  | 4.1  | 12.9 | 31.0 | 44.4 | 3.6  |
| IT290885 | KOR | 2.44  | 3.61  | 11.4 | 19.1 | 0.6 | 2.5 | 11.7 | 14.4 | 7.9  | 20.4 | 47.5 | 63.1 | 3.7  |
| IT290886 | KOR | 5.96  | 3.49  | 11.1 | 15.9 | 0.2 | 2.1 | 14.1 | 9.4  | 4.7  | 14.0 | 20.8 | 36.4 | 1.9  |
| IT290887 | KOR | 1.65  | 3.66  | 15.1 | 15.7 | -   | 2.0 | 14.9 | 11.9 | 9.2  | 24.2 | 37.2 | 55.3 | 5.0  |



|          |     |       |       |      |      |     |     |      |      |      |      |      |      |     |
|----------|-----|-------|-------|------|------|-----|-----|------|------|------|------|------|------|-----|
| IT290888 | KOR | 0.76  | 1.86  | 16.3 | 16.0 | 3.1 | 3.0 | 7.2  | 10.4 | 7.4  | 18.7 | 51.1 | 69.5 | 1.2 |
| IT290890 | KOR | 0.90  | 1.19  | 15.2 | 20.0 | 0.4 | 1.3 | 9.5  | 10.4 | 6.7  | 14.1 | 36.5 | 54.4 | 2.6 |
| IT290891 | KOR | 20.53 | 9.22  | 6.7  | 19.7 | 1.3 | 2.1 | 15.3 | 10.5 | 3.6  | 15.6 | 23.7 | 56.0 | 3.1 |
| IT290892 | KOR | 4.14  | 5.01  | 18.1 | 19.0 | 1.9 | 1.5 | 11.9 | 9.2  | 10.2 | 22.2 | 39.9 | 65.5 | 2.3 |
| IT290893 | KOR | 0.98  | 6.87  | 18.5 | 15.3 | 0.2 | 3.4 | 7.0  | 8.0  | 6.2  | 13.1 | 43.9 | 55.5 | 1.9 |
| IT290894 | KOR | -     | 7.06  | 6.5  | 12.2 | 1.2 | 1.7 | 8.0  | 5.7  | 3.9  | 10.0 | 27.5 | 34.0 | 3.6 |
| IT290895 | KOR | 3.31  | 2.67  | 13.4 | 15.0 | 0.4 | 6.1 | 10.5 | 9.2  | 10.6 | 20.9 | 41.6 | 65.0 | 2.8 |
| IT290896 | KOR | 1.38  | 2.22  | 10.8 | 7.2  | 2.0 | 1.9 | 6.5  | 5.9  | 3.4  | 8.8  | 17.1 | 27.3 | 3.5 |
| IT290897 | KOR | 1.10  | 2.81  | 20.0 | 20.8 | 1.0 | 1.5 | 7.7  | 6.5  | 7.9  | 22.0 | 59.4 | 83.8 | 1.5 |
| IT290898 | KOR | 2.20  | 5.10  | 12.6 | 16.8 | 2.0 | 1.8 | 7.3  | 8.5  | 5.3  | 14.1 | 40.2 | 53.2 | 1.9 |
| IT290899 | KOR | -     | 2.40  | 19.3 | 22.5 | 0.4 | 2.6 | 10.7 | 7.9  | 6.5  | 15.1 | 51.3 | 76.4 | 2.3 |
| IT290900 | KOR | 1.35  | 3.80  | 14.8 | 20.2 | 0.6 | 1.5 | 8.8  | 6.0  | 9.8  | 21.4 | 35.3 | 49.2 | 2.0 |
| IT290901 | KOR | 1.66  | 8.36  | 17.6 | 17.9 | -   | 0.9 | 12.8 | 8.6  | 8.3  | 19.2 | 42.0 | 68.4 | 4.3 |
| IT290902 | KOR | -     | 8.28  | 17.1 | 18.2 | -   | 3.2 | 11.7 | 18.1 | 7.0  | 15.5 | 36.6 | 41.0 | 3.6 |
| IT290903 | KOR | -     | 6.69  | 18.9 | 13.4 | -   | 4.0 | 11.3 | 9.0  | 6.5  | 18.8 | 38.5 | 46.5 | 1.6 |
| IT290904 | KOR | 0.70  | 1.35  | 14.7 | 13.8 | 0.5 | 1.5 | 9.4  | 8.7  | 4.1  | 9.4  | 32.4 | 50.9 | 1.9 |
| IT290905 | KOR | -     | 4.56  | 15.8 | 15.2 | -   | 1.9 | 6.8  | 5.6  | 5.3  | 11.6 | 36.7 | 49.8 | 1.4 |
| IT290906 | KOR | 2.07  | 5.60  | 18.2 | 25.7 | 2.3 | 2.1 | 8.0  | 6.7  | 12.1 | 34.4 | 56.8 | 78.3 | 3.0 |
| IT290907 | KOR | 3.38  | 4.99  | 15.3 | 16.6 | 2.3 | 2.4 | 5.8  | 7.9  | 6.0  | 16.0 | 43.7 | 63.8 | 1.5 |
| IT290908 | KOR | 3.15  | 18.96 | 24.4 | 22.3 | -   | 2.8 | 8.9  | 7.3  | 9.6  | 20.2 | 56.7 | 79.5 | 3.3 |
| IT290909 | KOR | -     | 5.32  | 20.8 | 23.2 | 2.6 | 2.0 | 9.3  | 6.4  | 5.7  | 22.3 | 49.0 | 68.4 | 2.5 |
| IT290910 | KOR | -     | 4.26  | 21.6 | 20.0 | 1.5 | 3.0 | 9.4  | 9.5  | 5.0  | 13.3 | 38.2 | 55.3 | 2.2 |
| IT290911 | KOR | -     | 5.22  | 18.1 | 18.5 | -   | 1.8 | 12.0 | 11.0 | 4.2  | 12.8 | 31.4 | 45.3 | 2.7 |
| IT290912 | KOR | -     | 12.70 | 15.5 | 9.4  | 0.7 | 3.7 | 8.8  | 22.9 | 5.0  | 6.2  | 33.7 | 31.7 | 1.8 |
| IT290913 | KOR | 0.87  | 2.83  | 13.2 | 13.4 | 1.6 | 2.3 | 8.7  | 10.0 | 6.6  | 15.8 | 30.2 | 44.3 | 1.2 |
| IT290914 | KOR | 2.25  | 5.17  | 14.3 | 23.0 | 1.6 | 3.1 | 7.2  | 7.6  | 7.2  | 14.0 | 50.7 | 78.2 | 1.1 |
| IT290915 | KOR | 2.18  | 5.59  | 17.0 | 15.2 | 1.6 | 2.6 | 7.1  | 8.8  | 5.8  | 17.7 | 40.4 | 54.7 | 1.4 |
| IT290916 | KOR | 1.79  | 4.32  | 19.5 | 18.9 | 2.4 | 2.9 | 6.9  | 9.2  | 5.6  | 16.8 | 47.2 | 71.0 | 3.0 |
| IT290917 | KOR | 1.86  | 4.62  | 15.9 | 23.4 | 0.4 | 2.9 | 6.5  | 8.6  | 7.2  | 18.6 | 43.6 | 58.2 | 0.9 |
| IT290918 | KOR | -     | 5.18  | 10.5 | 18.3 | 0.3 | 3.8 | 6.4  | 5.1  | 4.8  | 13.5 | 39.2 | 50.6 | 1.4 |
| IT290919 | KOR | -     | 7.36  | 12.4 | 19.8 | -   | 1.0 | 9.7  | 5.5  | 6.3  | 20.2 | 38.4 | 52.2 | 2.8 |
| IT290920 | KOR | 1.96  | 3.32  | 16.0 | 20.9 | 1.0 | 2.3 | 7.0  | 10.7 | 6.3  | 15.9 | 39.9 | 61.8 | 2.9 |
| IT290921 | KOR | 2.99  | 8.13  | 22.5 | 22.1 | 2.3 | 1.9 | 8.1  | 8.1  | 5.8  | 14.7 | 39.4 | 60.6 | 3.1 |
| IT290922 | KOR | -     | 3.82  | 22.7 | 21.6 | 0.7 | 4.1 | 9.3  | 5.1  | 7.0  | 19.1 | 56.0 | 86.2 | 0.7 |
| IT290923 | KOR | -     | 4.34  | 13.6 | 19.7 | 0.6 | 1.7 | 12.8 | 7.9  | 5.9  | 12.1 | 29.8 | 49.2 | 0.8 |
| IT290924 | KOR | 2.01  | 1.71  | 20.1 | 5.1  | -   | 1.5 | 21.4 | 10.2 | 8.4  | 5.2  | 39.0 | 17.9 | 2.9 |
| IT290925 | KOR | 1.61  | 5.86  | 13.5 | 24.6 | 1.4 | 5.8 | 10.0 | 4.8  | 9.0  | 23.7 | 48.5 | 71.9 | 2.9 |
| IT290926 | KOR | -     | 1.80  | 14.0 | 17.2 | 0.2 | 1.2 | 10.5 | 9.8  | 5.1  | 12.9 | 35.6 | 58.4 | 2.3 |
| IT290927 | KOR | -     | 3.68  | 19.4 | 22.4 | 3.8 | 3.4 | 11.1 | 6.0  | 7.2  | 30.3 | 46.7 | 68.6 | 2.2 |
| IT290928 | KOR | 1.49  | 4.87  | 20.5 | 15.5 | 3.6 | 4.5 | 6.7  | 7.8  | 5.4  | 20.7 | 42.1 | 59.0 | 1.8 |
| IT290929 | KOR | -     | 5.35  | 16.5 | 23.7 | 0.2 | 0.0 | 11.1 | 11.5 | 5.9  | 16.5 | 37.6 | 59.6 | 4.3 |
| IT290930 | KOR | 1.43  | 8.63  | 18.6 | 16.9 | -   | 2.3 | 6.7  | 5.7  | 6.0  | 16.3 | 47.1 | 64.6 | 1.7 |
| IT290931 | KOR | 1.83  | 7.57  | 12.2 | 20.9 | 0.3 | 1.2 | 7.3  | 11.1 | 5.9  | 18.4 | 37.7 | 49.7 | 2.5 |
| IT290932 | KOR | 3.30  | 5.37  | 16.8 | 21.4 | 0.2 | 1.6 | 7.4  | 6.2  | 5.5  | 15.2 | 43.6 | 68.0 | 1.0 |
| IT290933 | KOR | -     | 2.80  | 11.2 | 17.7 | 0.7 | 1.4 | 9.5  | 10.7 | 4.4  | 11.9 | 33.8 | 49.9 | 1.6 |
| IT290934 | KOR | 0.64  | 7.73  | 14.1 | 15.9 | 1.3 | 1.6 | 10.1 | 9.5  | 7.5  | 18.0 | 36.3 | 54.4 | 1.9 |
| IT290935 | KOR | -     | 3.66  | 13.7 | 21.6 | -   | 1.4 | 9.2  | 11.4 | 6.8  | 21.3 | 41.9 | 55.6 | 2.2 |
| IT290936 | KOR | -     | 7.61  | 18.0 | 23.8 | 0.8 | 2.3 | 11.7 | 11.9 | 5.8  | 23.2 | 38.8 | 53.4 | 3.7 |
| IT290937 | KOR | 1.03  | 4.24  | 11.9 | 14.6 | 0.9 | 2.4 | 8.1  | 8.9  | 4.9  | 15.4 | 29.6 | 42.7 | 1.9 |
| IT290938 | KOR | 1.27  | 3.22  | 15.9 | 17.2 | 0.2 | 2.0 | 7.9  | 6.4  | 8.1  | 20.3 | 39.3 | 61.6 | 1.9 |



|          |     |      |       |      |      |     |     |      |      |      |      |      |      |     |
|----------|-----|------|-------|------|------|-----|-----|------|------|------|------|------|------|-----|
| IT290939 | KOR | 1.06 | 7.30  | 11.9 | 19.4 | 0.9 | 1.4 | 9.6  | 9.8  | 9.9  | 23.9 | 36.5 | 58.2 | 5.0 |
| IT290940 | KOR | 4.43 | 3.89  | 4.9  | 16.9 | 0.6 | 1.6 | 10.3 | 10.3 | 4.6  | 13.1 | 29.9 | 56.0 | 3.4 |
| IT290941 | KOR | 2.36 | 7.19  | 9.5  | 22.4 | 1.4 | 1.3 | 13.2 | 7.0  | 9.1  | 24.8 | 33.6 | 57.3 | 1.2 |
| IT290942 | KOR | 1.29 | 5.25  | 15.6 | 19.9 | 0.9 | 2.1 | 7.5  | 11.3 | 5.5  | 21.0 | 42.9 | 57.4 | 1.7 |
| IT290943 | KOR | 1.61 | 4.66  | 21.6 | 28.4 | 0.9 | 1.7 | 9.8  | 6.3  | 4.9  | 16.0 | 44.9 | 70.9 | 3.4 |
| IT290944 | KOR | 2.60 | 3.11  | 19.6 | 18.1 | 0.6 | 2.2 | 6.5  | 9.7  | 5.7  | 17.1 | 37.5 | 59.1 | 3.2 |
| IT290946 | KOR | -    | 3.36  | 15.7 | 17.3 | -   | 3.2 | 9.6  | 8.8  | 5.4  | 15.6 | 33.9 | 50.4 | 2.2 |
| IT290948 | KOR | -    | 2.76  | 12.5 | 17.3 | 0.6 | 3.1 | 6.2  | 2.9  | 5.7  | 15.2 | 40.9 | 62.9 | 2.8 |
| IT290949 | KOR | -    | 6.41  | 12.7 | 7.0  | 1.7 | 5.2 | 6.1  | 12.7 | 3.3  | 8.8  | 27.2 | 28.7 | 1.4 |
| IT290951 | KOR | 0.51 | 2.79  | 14.3 | 13.0 | 0.8 | 1.8 | 6.1  | 8.9  | 3.3  | 9.1  | 30.1 | 46.3 | 2.1 |
| IT290952 | KOR | 3.81 | 3.20  | 4.6  | 17.0 | 1.7 | 1.4 | 10.8 | 6.2  | 5.0  | 13.0 | 33.3 | 69.9 | 1.4 |
| IT290953 | KOR | 1.10 | 5.26  | 18.7 | 17.6 | -   | 1.3 | 7.5  | 9.9  | 6.2  | 18.0 | 34.0 | 48.9 | 3.0 |
| IT290954 | JPN | -    | 5.41  | 16.7 | 15.8 | -   | 2.6 | 8.1  | 14.4 | 3.2  | 10.3 | 28.0 | 33.3 | 3.6 |
| IT290955 | JPN | 1.73 | 3.19  | 16.0 | 3.8  | -   | 2.4 | 13.7 | 7.8  | 12.7 | 5.5  | 59.9 | 25.1 | 1.7 |
| IT290956 | JPN | 0.81 | 3.23  | 17.9 | 20.2 | 0.4 | 0.5 | 10.0 | 10.7 | 7.1  | 15.5 | 37.8 | 66.2 | 1.9 |
| IT290957 | JPN | 0.66 | 3.05  | 18.4 | 20.1 | -   | -   | 6.2  | 6.0  | 5.6  | 18.2 | 46.2 | 74.6 | 2.3 |
| IT290958 | JPN | 4.59 | 8.70  | 3.3  | 11.5 | 2.0 | 2.9 | 11.6 | 17.9 | 2.5  | 12.1 | 24.0 | 35.2 | 1.7 |
| IT290959 | JPN | 1.82 | 3.23  | 15.6 | 17.7 | -   | 0.7 | 8.0  | 9.5  | 6.2  | 16.9 | 42.8 | 72.4 | 1.6 |
| IT290960 | JPN | -    | 4.03  | 16.6 | 15.0 | -   | 2.3 | 12.7 | 13.4 | 4.5  | 11.8 | 30.7 | 52.5 | 2.0 |
| IT290961 | JPN | 2.81 | 5.45  | 11.9 | 13.3 | 2.0 | 1.6 | 11.6 | 12.3 | 10.7 | 29.1 | 37.1 | 64.0 | 1.8 |
| IT290962 | JPN | -    | 4.47  | 13.6 | 18.7 | 1.2 | 3.5 | 10.0 | 9.7  | 5.5  | 18.6 | 39.9 | 62.0 | 1.5 |
| IT290963 | JPN | 1.68 | 5.55  | 14.6 | 16.0 | -   | 0.7 | 8.0  | 8.8  | 8.4  | 19.1 | 40.9 | 71.0 | 2.0 |
| IT290964 | JPN | 1.63 | 3.05  | 14.4 | 22.5 | 0.7 | 1.2 | 4.4  | 8.7  | 6.4  | 15.5 | 38.9 | 67.9 | 3.5 |
| IT290965 | JPN | 0.93 | 3.23  | 16.9 | 20.9 | 1.5 | 4.5 | 9.6  | 10.1 | 6.5  | 21.1 | 46.4 | 81.2 | 2.0 |
| IT290968 | JPN | 3.34 | 5.00  | 15.6 | 17.9 | 1.1 | 2.5 | 8.9  | 10.0 | 6.4  | 19.6 | 34.9 | 65.5 | 3.8 |
| IT290971 | CHN | -    | 7.99  | 11.7 | 21.5 | -   | 2.6 | 10.7 | 10.0 | 7.7  | 28.7 | 37.0 | 49.2 | 1.9 |
| IT290972 | CHN | 2.03 | 17.58 | 17.8 | 22.4 | 1.0 | 1.2 | 7.0  | 6.3  | 7.5  | 22.8 | 56.9 | 90.7 | 2.6 |
| IT290973 | CHN | 0.48 | 3.12  | 13.5 | 19.1 | 0.9 | 2.7 | 9.5  | 10.1 | 5.6  | 18.5 | 38.7 | 69.4 | 2.0 |
| IT290974 | CHN | -    | 3.26  | 12.7 | 17.7 | -   | 1.2 | 12.3 | 8.4  | 4.4  | 16.6 | 29.8 | 56.4 | 1.6 |
| IT290975 | CHN | 0.79 | 3.64  | 16.6 | 19.7 | 0.3 | 1.9 | 8.1  | 8.6  | 5.2  | 12.8 | 32.7 | 56.2 | 1.0 |
| IT290976 | CHN | 8.07 | 4.48  | 1.9  | 19.1 | 2.7 | 2.9 | 6.1  | 11.3 | 2.5  | 15.4 | 24.5 | 52.8 | 3.5 |
| IT290977 | CHN | 1.97 | 5.95  | 12.5 | 13.6 | 2.1 | 1.9 | 5.3  | 6.5  | 3.5  | 12.3 | 26.9 | 47.3 | 1.7 |
| IT290978 | CHN | -    | 2.16  | 15.6 | 12.5 | 0.8 | 5.2 | 7.5  | 13.4 | 3.3  | 10.4 | 25.9 | 42.4 | 2.3 |
| IT290979 | CHN | 5.08 | 2.36  | 29.2 | 7.4  | 2.8 | 3.3 | 15.7 | 9.2  | 14.0 | 6.5  | 40.8 | 13.2 | 5.8 |
| IT290980 | CHN | 0.68 | 2.18  | 13.3 | 16.5 | 0.2 | 1.6 | 8.4  | 9.2  | 5.9  | 16.6 | 30.1 | 58.3 | 1.9 |
| IT290981 | CHN | -    | 7.05  | 8.9  | 15.8 | -   | 1.4 | 10.8 | 14.7 | 4.2  | 15.5 | 31.2 | 51.3 | 2.4 |
| IT290982 | CHN | -    | 5.52  | 21.4 | 21.5 | 0.2 | 1.4 | 9.2  | 5.9  | 4.2  | 17.3 | 27.0 | 49.6 | 3.3 |
| IT290983 | CHN | 0.63 | 5.94  | 20.4 | 26.1 | -   | 1.8 | 10.3 | 11.3 | 5.0  | 17.3 | 32.1 | 52.3 | 0.8 |
| IT290984 | CHN | 1.85 | 4.51  | 18.4 | 23.8 | 0.3 | 1.3 | 6.8  | 6.4  | 4.9  | 15.7 | 39.9 | 75.5 | 3.3 |
| IT290985 | CHN | 1.89 | 9.37  | 12.5 | 13.2 | 1.2 | 2.0 | 5.5  | 11.5 | 5.4  | 18.1 | 29.2 | 42.9 | 1.4 |
| IT290986 | CHN | 1.03 | 4.84  | 13.3 | 20.5 | 0.7 | 3.2 | 10.5 | 5.7  | 6.8  | 20.3 | 32.5 | 68.7 | 2.7 |
| IT290987 | CHN | 1.78 | 6.12  | 15.7 | 22.3 | -   | 1.0 | 6.1  | 7.1  | 5.8  | 22.7 | 29.5 | 48.1 | 1.2 |
| IT290988 | CHN | -    | 2.62  | 10.7 | 16.0 | 1.4 | 2.7 | 6.4  | 9.3  | 3.2  | 14.3 | 27.8 | 48.4 | 1.2 |
| IT290989 | CHN | 2.77 | 5.66  | 16.9 | 19.6 | -   | -   | 8.9  | 14.7 | 4.2  | 19.2 | 32.2 | 59.6 | 1.6 |
| IT290990 | CHN | -    | 3.77  | 14.1 | 24.5 | 1.8 | -   | 6.8  | 5.0  | 4.3  | 24.4 | 36.3 | 63.8 | 1.5 |
| IT290992 | CHN | 1.66 | 2.83  | 12.7 | 18.3 | 1.4 | 2.6 | 12.2 | 14.2 | 3.6  | 15.5 | 23.2 | 53.1 | 2.2 |
| IT290996 | CHN | 3.89 | 5.32  | 16.2 | 23.5 | -   | 1.2 | 8.0  | 5.6  | 5.0  | 17.0 | 27.2 | 57.9 | 1.1 |
| IT290997 | CHN | 1.99 | 1.05  | 25.6 | 1.7  | -   | 2.0 | 12.2 | 8.4  | 13.2 | 4.5  | 63.1 | 19.8 | 4.4 |
| IT290998 | CHN | 4.37 | 4.98  | 3.1  | 19.1 | 0.6 | 2.3 | 5.5  | 5.9  | 2.0  | 10.2 | 19.9 | 50.9 | 2.8 |
| IT290999 | CHN | 1.59 | 7.34  | 16.0 | 27.5 | -   | 2.2 | 7.5  | 10.5 | 4.3  | 24.1 | 28.6 | 56.2 | 3.5 |



|          |     |       |      |      |      |     |     |      |     |      |      |      |      |     |
|----------|-----|-------|------|------|------|-----|-----|------|-----|------|------|------|------|-----|
| IT291000 | CHN | -     | 6.32 | 16.6 | 20.7 | -   | 2.8 | 6.3  | 6.7 | 2.9  | 14.8 | 32.1 | 67.2 | 1.4 |
| IT291001 | CHN | 1.22  | 9.17 | 16.6 | 28.8 | 1.3 | 1.9 | 9.1  | 9.6 | 5.3  | 27.2 | 40.0 | 88.4 | 3.0 |
| IT291002 | CHN | 31.17 | -    | 24.2 | -    | -   | -   | 5.7  | -   | 17.2 | -    | 52.6 | -    | 2.4 |
| IT291003 | CHN | 42.53 | -    | 7.9  | -    | 0.9 | -   | 24.7 | -   | 2.5  | -    | 13.8 | -    | 2.2 |
| IT291006 | CHN | 2.81  | -    | 22.5 | -    | 1.8 | -   | 8.3  | -   | 7.0  | -    | 54.1 | -    | 3.1 |
| IT291007 | CHN | 28.29 | -    | 0.4  | -    | 1.9 | -   | 23.6 | -   | 4.0  | -    | 17.1 | -    | 1.4 |
| IT291008 | CHN | 12.70 | -    | 7.0  | -    | 3.2 | -   | 18.0 | -   | 4.1  | -    | 28.3 | -    | 2.2 |
| IT291009 | CHN | 25.41 | -    | 1.7  | -    | 5.1 | -   | 16.1 | -   | 2.8  | -    | 14.2 | -    | 5.7 |
| IT291010 | CHN | 7.95  | -    | 18.4 | -    | 0.4 | -   | 14.7 | -   | 8.5  | -    | 35.7 | -    | 0.7 |
| IT291013 | CHN | 9.04  | -    | 17.1 | -    | 0.7 | -   | 10.9 | -   | 6.3  | -    | 30.7 | -    | 4.7 |
| IT291015 | CHN | 13.12 | -    | 4.6  | -    | 0.7 | -   | 17.2 | -   | 3.7  | -    | 22.3 | -    | 2.2 |
| IT291018 | CHN | 10.67 | -    | 3.9  | -    | 1.5 | -   | 15.1 | -   | 4.3  | -    | 20.8 | -    | 4.2 |
| IT291021 | CHN | -     | -    | 8.2  | -    | 2.7 | -   | 8.3  | -   | 3.4  | -    | 26.2 | -    | 1.3 |
| IT291027 | IDN | 2.15  | 2.17 | 21.8 | 17.0 | 1.4 | 0.6 | 9.6  | 8.1 | 7.0  | 14.0 | 46.6 | 54.6 | 1.8 |
| IT291028 | IDN | 2.46  | 2.45 | 26.4 | 17.8 | 2.9 | 1.9 | 14.2 | 5.6 | 17.8 | 20.2 | 67.8 | 50.8 | 2.5 |
| IT291029 | IDN | 2.70  | 1.67 | 16.0 | 15.5 | -   | 1.4 | 7.7  | 4.7 | 8.3  | 15.9 | 43.6 | 51.5 | 2.3 |

<sup>1</sup> C, (+)-Catechin; Caf, Caffeine; CG, (-)-Catechin 3-gallate; EC, (-)-Epicatechin; ECG, (-)-Epigallocatechin 3-gallate Gallocatechin 3-gallate; TC, total catechin



| C    | GCG  |      |        | TC     |                 | Cluster | Structure | DAPC | Target-Oriented |
|------|------|------|--------|--------|-----------------|---------|-----------|------|-----------------|
| 2019 | 2018 | 2019 | 2018   | 2019   | Core Collection |         |           |      |                 |
| 7.7  | 0.5  | 0.9  | 69.24  | 69.35  | 1               | 2       | 4         | O    |                 |
| 7.5  | 0.5  | 0.9  | 63.68  | 63.82  | 4               | 2       | 4         |      |                 |
| 9.5  | 0.6  | 1.7  | 78.09  | 78.33  | 4               | 2       | 4         |      |                 |
| 6.1  | 1.7  | 3.3  | 86.63  | 87.03  | 1               | 1       | 3         |      |                 |
| 7.5  | 0.1  | 0.7  | 79.13  | 78.25  | 2               | 1       | 3         | O    |                 |
| 4.0  | 0.0  | 0.7  | 74.80  | 73.78  | 1               | 1       | 3         |      |                 |
| 8.9  | 0.7  | 1.1  | 104.54 | 106.04 | 1               | 1       | 3         |      |                 |
| 6.7  | 1.3  | 3.4  | 85.56  | 86.92  | 1               | 2       | 4         |      |                 |
| 7.1  | 0.4  | 0.9  | 59.29  | 60.26  | 1               | 2       | 4         | O    |                 |
| 4.2  | 0.3  | 0.7  | 62.89  | 61.80  | 4               | 2       | 4         | O    |                 |
| 6.9  | 2.1  | 3.9  | 94.71  | 96.44  | 1               | 2       | 4         | O    |                 |
| 7.6  | 0.7  | 1.5  | 68.05  | 69.37  | 4               | 2       | 4         |      |                 |
| 7.5  | 0.6  | 1.7  | 105.13 | 107.26 | 1               | 1       | 3         |      |                 |
| 7.7  | 0.7  | 1.5  | 99.80  | 97.58  | 4               | 2       | 2         |      |                 |
| 7.4  | 0.1  | 1.3  | 82.39  | 80.53  | 1               | 2       | 4         | O    |                 |
| 9.6  | 0.5  | 1.7  | 109.26 | 111.82 | 1               | 2       | 4         |      |                 |
| 4.4  | 0.3  | 2.7  | 77.10  | 79.07  | 1               | 1       | 3         |      |                 |
| 7.4  | 0.4  | 0.8  | 79.18  | 77.12  | 1               | 2       | 4         |      |                 |
| 6.1  | 0.3  | 1.2  | 64.55  | 66.36  | 4               | 2       | 2         | O    |                 |
| 8.1  | 0.7  | 1.9  | 80.80  | 83.19  | 2               | 1       | 3         |      |                 |
| 6.4  | 0.0  | 1.4  | 60.70  | 58.94  | 2               | 1       | 3         |      |                 |
| 4.2  | 0.4  | 0.9  | 50.82  | 52.34  | 1               | 2       | 4         |      |                 |
| 6.0  | 0.8  | 2.8  | 88.59  | 91.51  | 4               | 2       | 4         | O    |                 |
| 9.6  | 0.6  | 1.9  | 81.59  | 84.37  | 1               | 2       | 2         |      |                 |
| 7.1  | 1.2  | 2.9  | 92.65  | 95.87  | 2               | 1       | 3         |      |                 |
| 10.0 | 0.8  | 2.0  | 90.43  | 93.72  | 1               | 1       | 3         |      |                 |
| 10.0 | 0.4  | 1.4  | 73.17  | 75.89  | 4               | 2       | 4         | O    |                 |
| 9.3  | 0.2  | 0.6  | 70.76  | 68.21  | 1               | 2       | 4         |      |                 |
| 8.3  | 0.5  | 2.1  | 78.38  | 75.32  | 1               | 2       | 3         |      |                 |
| 12.0 | 0.7  | 1.4  | 81.68  | 85.07  | 1               | 2       | 4         |      |                 |
| 6.3  | 0.7  | 1.7  | 69.42  | 72.36  | 4               | 2       | 4         | O    |                 |
| 7.5  | 0.4  | 2.1  | 82.66  | 86.59  | 1               | 2       | 4         |      |                 |
| 10.4 | 0.6  | 1.5  | 74.60  | 78.26  | 1               | 1       | 3         |      |                 |
| 6.5  | 0.6  | 1.4  | 76.22  | 80.04  | 4               | 1       | 3         |      |                 |
| 5.0  | 1.4  | 2.1  | 65.16  | 68.47  | 2               | 2       | 4         | O    |                 |
| 5.4  | 0.5  | 0.8  | 63.15  | 59.80  | 4               | 1       | 1         |      |                 |
| 7.0  | 0.3  | 0.7  | 68.03  | 72.05  | 4               | 2       | 4         |      |                 |
| 8.6  | 0.9  | 3.4  | 92.69  | 98.20  | 4               | 2       | 4         |      |                 |
| 8.3  | 0.9  | 1.4  | 92.46  | 87.20  | 1               | 1       | 3         | O    |                 |
| 10.4 | 0.3  | 0.6  | 77.67  | 82.40  | 4               | 1       | 3         |      |                 |
| 8.1  | 0.2  | 0.5  | 63.74  | 60.07  | 4               | 2       | 4         |      |                 |
| 7.8  | 0.2  | 1.2  | 67.42  | 63.53  | 4               | 2       | 4         |      |                 |
| 8.8  | 1.0  | 1.5  | 80.39  | 75.55  | 3               | 2       | 4         | O    |                 |
| 7.5  | 0.9  | 1.0  | 61.02  | 64.93  | 2               | 1       | 3         |      |                 |
| 6.9  | 0.2  | 0.3  | 82.79  | 77.71  | 4               | 2       | 4         |      |                 |
| 9.2  | 0.2  | 4.8  | 68.34  | 72.88  | 1               | 2       | 4         |      |                 |



|      |     |     |        |        |   |   |   |   |
|------|-----|-----|--------|--------|---|---|---|---|
| 7.1  | 1.5 | 2.0 | 68.54  | 64.22  | 4 | 2 | 4 |   |
| 5.7  | 0.3 | 1.6 | 62.05  | 66.32  | 3 | 1 | 3 | O |
| 8.2  | 0.8 | 1.1 | 78.71  | 73.29  | 4 | 2 | 4 | O |
| 7.6  | 0.3 | 1.7 | 66.52  | 71.45  | 2 | 1 | 3 |   |
| 6.2  | 0.1 | 3.2 | 63.92  | 68.72  | 4 | 2 | 4 |   |
| 8.2  | 1.3 | 1.2 | 86.37  | 93.01  | 1 | 2 | 4 |   |
| 8.6  | 0.4 | 0.8 | 83.41  | 89.90  | 1 | 2 | 4 | O |
| 9.5  | 0.4 | 0.7 | 92.25  | 85.31  | 1 | 2 | 4 |   |
| 5.7  | 0.8 | 3.6 | 77.02  | 83.31  | 4 | 2 | 4 | O |
| 6.3  | 1.3 | 3.3 | 97.47  | 105.72 | 2 | 2 | 4 |   |
| 9.7  | 0.4 | 0.6 | 65.66  | 71.48  | 1 | 2 | 4 | O |
| 10.6 | 0.2 | 0.6 | 76.08  | 82.90  | 1 | 2 | 4 |   |
| 9.2  | 0.3 | 0.7 | 53.95  | 49.49  | 4 | 2 | 4 |   |
| 8.3  | 0.8 | 2.9 | 114.25 | 124.60 | 1 | 2 | 4 |   |
| 5.2  | 0.2 | 3.2 | 77.13  | 84.17  | 2 | 2 | 4 | O |
| 9.5  | 0.4 | 1.4 | 103.15 | 94.45  | 4 | 2 | 4 |   |
| 9.1  | 0.4 | 1.2 | 75.61  | 82.66  | 4 | 2 | 1 |   |
| 4.5  | 3.3 | 9.8 | 97.23  | 106.38 | 3 | 1 | 1 |   |
| 7.6  | 0.3 | 3.5 | 72.59  | 79.45  | 1 | 2 | 4 |   |
| 6.9  | 0.9 | 1.4 | 62.83  | 57.39  | 4 | 2 | 4 |   |
| 7.3  | 0.4 | 1.4 | 84.40  | 77.08  | 4 | 1 | 3 |   |
| 7.4  | 1.1 | 2.3 | 80.34  | 87.97  | 4 | 2 | 4 |   |
| 12.0 | 1.2 | 2.0 | 70.63  | 77.46  | 1 | 2 | 2 |   |
| 4.1  | 0.3 | 1.6 | 79.70  | 87.54  | 4 | 1 | 3 |   |
| 6.7  | 0.3 | 1.4 | 77.71  | 70.74  | 2 | 2 | 4 |   |
| 6.6  | 0.6 | 1.5 | 71.31  | 78.37  | 1 | 2 | 4 |   |
| 5.4  | 0.5 | 0.5 | 80.20  | 88.57  | 1 | 1 | 1 |   |
| 6.3  | 0.1 | 0.7 | 74.66  | 82.48  | 4 | 2 | 4 |   |
| 7.2  | 0.4 | 1.3 | 64.47  | 71.60  | 4 | 2 | 2 |   |
| 6.5  | 0.3 | 1.4 | 67.52  | 75.01  | 4 | 1 | 1 |   |
| 8.8  | 0.7 | 1.4 | 68.98  | 76.73  | 4 | 1 | 1 | O |
| 6.0  | 0.1 | 0.7 | 61.58  | 55.33  | 4 | 2 | 2 | O |
| 6.6  | 1.3 | 5.1 | 95.50  | 106.36 | 4 | 1 | 1 |   |
| 5.5  | 1.0 | 2.8 | 85.39  | 95.21  | 2 | 1 | 3 |   |
| 7.5  | 0.3 | 0.8 | 61.02  | 68.08  | 2 | 2 | 4 |   |
| 4.9  | 0.1 | 1.7 | 64.19  | 57.50  | 4 | 2 | 2 |   |
| 8.5  | 1.0 | 4.4 | 93.42  | 83.47  | 4 | 1 | 1 | O |
| 8.2  | 0.3 | 1.8 | 77.36  | 86.66  | 4 | 1 | 1 |   |
| 6.1  | 0.3 | 1.4 | 62.10  | 55.35  | 2 | 1 | 3 | O |
| 6.7  | 0.7 | 1.2 | 82.96  | 93.19  | 2 | 1 | 1 |   |
| 5.8  | 0.3 | 0.7 | 83.10  | 73.95  | 1 | 2 | 4 | O |
| 10.2 | 0.4 | 3.2 | 78.24  | 87.96  | 2 | 2 | 2 | O |
| 9.4  | 1.1 | 1.9 | 92.03  | 81.74  | 2 | 1 | 1 |   |
| 7.9  | 0.4 | 0.9 | 74.96  | 66.56  | 4 | 1 | 1 |   |
| 8.0  | 0.3 | 0.6 | 84.08  | 94.70  | 3 | 1 | 1 |   |
| 7.6  | 0.5 | 5.5 | 67.48  | 76.02  | 1 | 2 | 4 |   |
| 11.3 | 0.8 | 2.1 | 103.13 | 116.22 | 3 | 1 | 1 |   |
| 11.3 | 0.7 | 2.1 | 103.49 | 116.64 | 2 | 1 | 1 |   |
| 6.2  | 0.2 | 1.3 | 65.89  | 58.46  | 4 | 1 | 1 |   |
| 9.1  | 0.2 | 2.5 | 77.18  | 68.44  | 2 | 1 | 1 |   |



|      |     |     |        |        |   |   |   |   |
|------|-----|-----|--------|--------|---|---|---|---|
| 6.8  | 0.4 | 1.5 | 67.10  | 75.69  | 4 | 2 | 2 | O |
| 6.3  | 0.8 | 1.4 | 54.31  | 48.06  | 4 | 1 | 1 |   |
| 8.4  | 0.3 | 1.3 | 95.19  | 84.19  | 2 | 2 | 4 | O |
| 4.4  | 0.0 | 1.4 | 58.41  | 66.14  | 2 | 1 | 1 |   |
| 7.5  | 0.4 | 1.5 | 104.34 | 91.98  | 1 | 2 | 4 | O |
| 12.3 | 2.2 | 4.7 | 81.91  | 93.07  | 2 | 2 | 2 |   |
| 5.9  | 0.3 | 1.1 | 75.70  | 86.12  | 2 | 2 | 2 | O |
| 9.0  | 0.5 | 1.1 | 90.21  | 102.91 | 2 | 2 | 4 |   |
| 6.1  | 0.5 | 0.8 | 70.37  | 80.33  | 2 | 1 | 3 |   |
| 6.8  | 0.4 | 0.5 | 62.18  | 71.04  | 2 | 1 | 3 | O |
| 11.8 | 0.6 | 1.8 | 77.28  | 88.32  | 2 | 1 | 3 |   |
| 6.6  | 0.3 | 1.1 | 57.40  | 65.71  | 2 | 1 | 1 |   |
| 6.0  | 0.2 | 1.8 | 59.04  | 51.53  | 4 | 1 | 1 | O |
| 10.5 | 0.8 | 2.4 | 79.14  | 90.81  | 4 | 2 | 4 |   |
| 7.8  | 0.4 | 1.1 | 56.97  | 65.40  | 4 | 2 | 2 |   |
| 8.3  | 0.4 | 0.9 | 88.86  | 102.16 | 4 | 2 | 4 |   |
| 6.4  | 0.2 | 1.1 | 71.41  | 82.11  | 3 | 1 | 3 | O |
| 5.4  | 0.3 | 0.8 | 76.82  | 88.47  | 2 | 1 | 3 |   |
| 3.8  | 0.6 | 3.1 | 81.79  | 94.38  | 4 | 2 | 2 |   |
| 4.4  | 0.2 | 1.6 | 64.06  | 55.45  | 3 | 2 | 2 | O |
| 5.0  | 0.9 | 3.9 | 96.28  | 111.41 | 1 | 1 | 3 |   |
| 8.5  | 0.9 | 0.8 | 61.72  | 71.55  | 1 | 1 | 1 |   |
| 9.5  | 0.7 | 1.9 | 66.04  | 76.62  | 4 | 1 | 3 |   |
| 4.7  | 1.1 | 1.7 | 67.64  | 78.57  | 4 | 2 | 4 |   |
| 6.7  | 0.3 | 1.9 | 85.33  | 99.28  | 4 | 1 | 3 |   |
| 7.6  | 0.6 | 1.2 | 68.44  | 79.86  | 4 | 2 | 4 |   |
| 9.3  | 0.4 | 1.9 | 78.10  | 91.15  | 2 | 1 | 1 |   |
| 8.1  | 0.3 | 1.4 | 73.81  | 86.19  | 4 | 1 | 1 |   |
| 9.0  | 0.0 | 1.6 | 78.04  | 91.16  | 4 | 1 | 3 |   |
| 8.6  | 0.2 | 1.1 | 82.16  | 70.26  | 4 | 2 | 4 |   |
| 4.9  | 0.6 | 2.0 | 96.61  | 113.21 | 3 | 1 | 1 |   |
| 7.9  | 0.5 | 1.0 | 82.87  | 70.41  | 1 | 1 | 3 |   |
| 7.2  | 0.3 | 2.3 | 68.77  | 81.01  | 3 | 1 | 3 | O |
| 6.1  | 0.1 | 0.8 | 74.58  | 88.09  | 3 | 2 | 4 | O |
| 12.6 | 0.2 | 0.7 | 82.61  | 97.61  | 4 | 2 | 4 |   |
| 9.9  | 0.6 | 1.6 | 74.25  | 87.80  | 3 | 1 | 1 |   |
| 6.2  | 0.7 | 2.2 | 63.42  | 75.06  | 4 | 1 | 1 |   |
| 7.3  | 0.3 | 2.1 | 76.24  | 90.35  | 3 | 2 | 4 | O |
| 4.8  | 0.2 | 1.9 | 75.67  | 89.69  | 3 | 1 | 1 |   |
| 6.9  | 0.2 | 1.2 | 80.96  | 96.09  | 4 | 2 | 4 | O |
| 7.7  | 0.5 | 1.9 | 84.62  | 100.63 | 3 | 1 | 1 |   |
| 6.9  | 0.2 | 0.7 | 76.71  | 91.49  | 4 | 1 | 1 | O |
| 9.7  | 0.4 | 0.6 | 63.77  | 76.07  | 4 | 1 | 1 |   |
| 8.2  | 0.3 | 0.8 | 88.16  | 73.41  | 4 | 2 | 4 |   |
| 9.4  | 0.4 | 1.4 | 108.13 | 89.95  | 4 | 2 | 4 |   |
| 6.2  | 0.2 | 0.8 | 68.94  | 82.93  | 4 | 2 | 1 |   |
| 4.4  | 0.3 | 1.1 | 61.69  | 74.22  | 3 | 1 | 3 | O |
| 5.4  | 0.6 | 2.9 | 62.83  | 75.64  | 3 | 1 | 1 |   |
| 7.2  | 0.4 | 1.1 | 51.23  | 61.74  | 2 | 1 | 1 |   |
| 7.2  | 0.7 | 1.9 | 73.68  | 88.96  | 3 | 1 | 3 |   |



|      |     |     |        |        |   |   |   |   |
|------|-----|-----|--------|--------|---|---|---|---|
| 8.1  | 0.2 | 1.1 | 82.62  | 99.84  | 4 | 1 | 1 | O |
| 5.3  | 0.3 | 1.9 | 83.95  | 101.54 | 4 | 2 | 2 |   |
| 7.5  | 0.3 | 1.4 | 51.73  | 62.58  | 1 | 2 | 4 |   |
| 7.7  | 0.4 | 0.9 | 92.96  | 112.53 | 2 | 2 | 4 |   |
| 7.7  | 0.4 | 3.3 | 74.67  | 90.43  | 2 | 2 | 2 |   |
| 6.9  | 0.5 | 1.0 | 61.07  | 74.00  | 2 | 1 | 1 |   |
| 6.4  | 0.1 | 1.3 | 94.44  | 114.75 | 2 | 2 | 4 |   |
| 7.8  | 0.8 | 3.6 | 71.92  | 88.00  | 2 | 1 | 1 |   |
| 9.6  | 0.3 | 1.2 | 72.49  | 88.79  | 2 | 1 | 1 |   |
| 9.2  | 0.4 | 0.7 | 56.66  | 69.42  | 2 | 2 | 4 |   |
| 7.3  | 0.3 | 1.2 | 79.50  | 97.53  | 2 | 1 | 1 |   |
| 8.7  | 0.5 | 1.5 | 90.90  | 112.18 | 2 | 2 | 1 |   |
| 5.8  | 0.4 | 1.8 | 61.88  | 76.38  | 3 | 1 | 3 |   |
| 8.4  | 0.4 | 1.6 | 89.04  | 109.93 | 2 | 2 | 4 |   |
| 4.1  | 0.7 | 3.4 | 104.61 | 84.69  | 3 | 1 | 1 |   |
| 5.9  | 0.3 | 1.3 | 62.85  | 77.69  | 2 | 1 | 3 |   |
| 8.2  | 1.5 | 1.2 | 64.73  | 80.06  | 1 | 1 | 1 |   |
| 5.8  | 0.4 | 2.1 | 77.10  | 95.42  | 1 | 2 | 4 |   |
| 6.7  | 0.3 | 1.8 | 68.63  | 85.03  | 2 | 1 | 1 |   |
| 5.8  | 0.6 | 1.1 | 86.68  | 107.40 | 2 | 1 | 3 |   |
| 6.7  | 0.8 | 1.8 | 101.43 | 81.64  | 2 | 1 | 1 |   |
| 7.0  | 0.3 | 1.4 | 76.16  | 94.85  | 4 | 1 | 3 |   |
| 8.4  | 0.7 | 1.3 | 94.77  | 76.02  | 4 | 1 | 1 |   |
| 7.1  | 0.2 | 0.5 | 52.17  | 65.11  | 4 | 2 | 4 |   |
| 7.6  | 0.3 | 2.7 | 63.17  | 78.91  | 2 | 1 | 1 |   |
| 7.0  | 0.2 | 2.2 | 58.82  | 73.58  | 4 | 1 | 1 |   |
| 8.2  | 0.2 | 1.2 | 69.00  | 86.32  | 3 | 1 | 3 |   |
| 7.7  | 0.9 | 2.6 | 84.49  | 105.82 | 4 | 2 | 4 |   |
| 5.1  | 0.8 | 3.3 | 94.39  | 118.21 | 1 | 1 | 3 |   |
| 7.3  | 0.3 | 2.2 | 54.81  | 69.14  | 1 | 1 | 3 |   |
| 6.7  | 0.7 | 3.1 | 91.27  | 115.20 | 1 | 1 | 3 |   |
| 9.3  | 2.9 | 3.4 | 111.44 | 88.29  | 1 | 1 | 3 |   |
| 5.7  | 0.2 | 0.9 | 89.63  | 70.90  | 2 | 1 | 1 |   |
| 8.9  | 0.5 | 2.0 | 73.59  | 93.22  | 2 | 1 | 1 | O |
| 5.8  | 0.2 | 2.3 | 59.25  | 75.41  | 1 | 2 | 2 |   |
| 7.7  | 0.9 | 3.5 | 85.04  | 108.51 | 4 | 2 | 4 | O |
| 11.0 | 0.4 | 2.0 | 91.18  | 116.40 | 4 | 2 | 2 |   |
| 6.8  | 0.1 | 2.1 | 64.01  | 81.82  | 2 | 1 | 1 |   |
| 9.8  | 0.5 | 1.2 | 68.05  | 87.07  | 2 | 2 | 4 |   |
| 8.3  | 0.2 | 0.6 | 65.84  | 84.55  | 2 | 1 | 1 |   |
| 6.6  | 0.9 | 3.8 | 90.68  | 116.55 | 2 | 2 | 4 |   |
| 7.3  | 0.4 | 1.4 | 73.82  | 94.98  | 2 | 2 | 2 |   |
| 6.8  | 0.4 | 2.4 | 62.35  | 80.31  | 2 | 2 | 4 |   |
| 5.9  | 0.2 | 1.0 | 57.07  | 44.28  | 1 | 1 | 3 |   |
| 7.5  | 0.3 | 3.5 | 74.54  | 96.11  | 2 | 2 | 4 |   |
| 9.0  | 0.2 | 0.6 | 47.05  | 60.68  | 1 | 2 | 4 |   |
| 8.5  | 0.0 | 1.7 | 67.11  | 86.56  | 4 | 1 | 1 |   |
| 6.6  | 0.2 | 0.9 | 68.71  | 53.24  | 4 | 2 | 4 |   |
| 6.6  | 1.6 | 3.6 | 64.41  | 83.24  | 1 | 2 | 4 |   |
| 7.6  | 0.5 | 1.0 | 64.44  | 83.39  | 4 | 2 | 4 |   |



|      |     |     |        |        |   |   |   |   |
|------|-----|-----|--------|--------|---|---|---|---|
| 5.3  | 0.4 | 1.3 | 97.48  | 126.66 | 4 | 1 | 1 |   |
| 6.7  | 0.3 | 1.5 | 48.97  | 63.83  | 4 | 1 | 1 |   |
| 7.3  | 0.2 | 1.0 | 70.55  | 53.98  | 4 | 1 | 3 |   |
| 4.9  | 0.3 | 3.0 | 51.38  | 67.18  | 4 | 1 | 3 |   |
| 8.1  | 0.3 | 1.7 | 49.22  | 64.41  | 4 | 1 | 3 |   |
| 8.3  | 0.9 | 1.8 | 113.32 | 86.58  | 4 | 2 | 4 |   |
| 12.1 | 0.2 | 1.0 | 79.87  | 104.54 | 4 | 1 | 1 |   |
| 10.8 | 0.2 | 1.5 | 75.32  | 98.82  | 1 | 1 | 3 |   |
| 6.3  | 0.3 | 2.9 | 61.51  | 80.71  | 1 | 1 | 1 |   |
| 10.1 | 0.4 | 1.5 | 96.26  | 126.38 | 2 | 2 | 4 | O |
| 9.6  | 0.1 | 1.0 | 70.88  | 93.31  | 2 | 2 | 4 |   |
| 7.0  | 0.2 | 1.9 | 65.76  | 86.59  | 4 | 2 | 4 |   |
| 6.6  | 0.3 | 1.5 | 96.79  | 127.48 | 4 | 2 | 4 |   |
| 8.6  | 0.1 | 1.1 | 68.31  | 90.11  | 4 | 2 | 2 |   |
| 7.8  | 0.2 | 0.8 | 49.35  | 65.17  | 1 | 2 | 4 |   |
| 6.9  | 0.7 | 3.1 | 71.69  | 94.70  | 2 | 2 | 4 |   |
| 10.1 | 0.3 | 1.7 | 81.41  | 107.53 | 1 | 2 | 2 | O |
| 10.0 | 0.6 | 1.5 | 60.50  | 79.97  | 2 | 2 | 2 | O |
| 5.7  | 0.8 | 4.2 | 99.61  | 131.79 | 1 | 2 | 4 |   |
| 5.8  | 1.8 | 3.7 | 86.92  | 115.02 | 1 | 2 | 1 |   |
| 7.8  | 0.6 | 1.5 | 65.28  | 86.45  | 1 | 2 | 4 |   |
| 7.6  | 0.3 | 0.9 | 57.43  | 76.12  | 1 | 1 | 1 |   |
| 8.6  | 0.5 | 1.7 | 82.33  | 109.43 | 1 | 1 | 1 |   |
| 6.9  | 0.3 | 1.8 | 50.97  | 67.76  | 4 | 2 | 4 |   |
| 6.4  | 0.5 | 2.7 | 69.52  | 92.66  | 1 | 2 | 4 |   |
| 6.7  | 1.8 | 5.6 | 80.96  | 108.20 | 4 | 1 | 1 |   |
| 6.8  | 0.4 | 0.9 | 71.42  | 53.29  | 2 | 2 | 4 |   |
| 8.6  | 0.6 | 1.3 | 58.95  | 79.26  | 1 | 2 | 1 |   |
| 5.8  | 0.2 | 1.8 | 54.53  | 73.36  | 1 | 1 | 1 |   |
| 8.3  | 0.4 | 1.0 | 54.48  | 73.32  | 3 | 1 | 1 |   |
| 8.1  | 0.3 | 0.7 | 73.88  | 54.88  | 1 | 1 | 1 |   |
| 10.6 | 0.3 | 0.6 | 75.92  | 102.22 | 4 | 2 | 4 |   |
| 3.2  | 1.4 | 6.2 | 94.92  | 127.80 | 4 | 2 | 4 |   |
| 4.3  | 0.9 | 3.3 | 97.40  | 72.33  | 4 | 2 | 2 | O |
| 5.0  | 0.2 | 1.3 | 55.83  | 75.23  | 2 | 1 | 3 |   |
| 6.6  | 0.6 | 2.3 | 80.30  | 108.30 | 1 | 2 | 4 | O |
| 9.8  | 1.5 | 3.2 | 99.52  | 134.65 | 1 | 1 | 1 |   |
| 7.7  | 0.1 | 0.9 | 70.79  | 95.91  | 1 | 1 | 1 |   |
| 7.1  | 0.4 | 2.5 | 70.71  | 95.87  | 2 | 2 | 4 |   |
| 7.0  | 0.5 | 1.8 | 96.26  | 130.53 | 4 | 2 | 4 |   |
| 9.1  | 1.0 | 2.3 | 82.56  | 111.98 | 4 | 2 | 4 |   |
| 8.0  | 0.2 | 1.0 | 62.60  | 85.04  | 1 | 2 | 4 |   |
| 8.0  | 0.1 | 0.7 | 46.56  | 63.33  | 2 | 1 | 3 |   |
| 7.0  | 0.3 | 1.9 | 54.27  | 73.83  | 4 | 2 | 4 |   |
| 8.5  | 0.3 | 2.1 | 68.74  | 93.63  | 2 | 2 | 4 |   |
| 12.9 | 0.3 | 2.7 | 71.99  | 98.12  | 4 | 2 | 4 |   |
| 12.9 | 0.5 | 1.3 | 74.20  | 101.23 | 3 | 2 | 4 |   |
| 4.5  | 0.4 | 1.0 | 65.22  | 89.00  | 4 | 2 | 4 | O |
| 11.1 | 1.1 | 3.1 | 75.93  | 103.67 | 3 | 2 | 4 |   |
| 7.3  | 0.3 | 1.3 | 63.58  | 86.95  | 4 | 2 | 2 |   |



|      |     |     |        |        |   |   |   |   |
|------|-----|-----|--------|--------|---|---|---|---|
| 6.8  | 0.6 | 2.0 | 76.36  | 104.56 | 3 | 1 | 1 |   |
| 9.3  | 0.7 | 1.4 | 68.47  | 93.77  | 3 | 2 | 4 |   |
| 6.1  | 0.5 | 2.9 | 58.56  | 80.23  | 4 | 2 | 2 |   |
| 7.3  | 0.6 | 0.9 | 94.28  | 68.74  | 4 | 2 | 2 |   |
| 12.6 | 0.4 | 1.4 | 70.98  | 97.58  | 3 | 1 | 1 | O |
| 6.5  | 0.4 | 2.4 | 59.31  | 81.60  | 1 | 2 | 4 |   |
| 6.6  | 0.1 | 1.3 | 65.00  | 89.56  | 3 | 1 | 3 |   |
| 8.8  | 0.1 | 2.8 | 78.34  | 108.22 | 3 | 2 | 4 | O |
| 12.5 | 0.3 | 1.0 | 51.29  | 70.87  | 1 | 2 | 2 | O |
| 5.6  | 0.1 | 1.9 | 62.63  | 86.62  | 1 | 2 | 4 |   |
| 9.7  | 0.3 | 0.9 | 63.75  | 88.33  | 3 | 2 | 4 |   |
| 7.2  | 1.8 | 3.3 | 82.36  | 114.15 | 4 | 2 | 4 |   |
| 9.3  | 0.5 | 2.9 | 90.50  | 125.80 | 4 | 2 | 4 |   |
| 7.9  | 0.4 | 1.6 | 77.62  | 107.99 | 4 | 2 | 4 |   |
| 5.1  | 0.7 | 2.4 | 61.35  | 85.36  | 4 | 2 | 4 |   |
| 6.6  | 0.8 | 2.3 | 71.58  | 99.60  | 1 | 2 | 4 | O |
| 7.3  | 0.2 | 1.7 | 67.88  | 94.53  | 3 | 1 | 1 | O |
| 8.1  | 0.7 | 1.7 | 65.93  | 91.91  | 1 | 1 | 1 |   |
| 7.3  | 0.6 | 2.2 | 73.82  | 102.97 | 3 | 1 | 1 |   |
| 8.0  | 1.7 | 3.6 | 125.25 | 89.78  | 4 | 2 | 4 |   |
| 6.3  | 0.2 | 1.5 | 76.75  | 54.97  | 3 | 1 | 3 |   |
| 6.6  | 0.4 | 1.6 | 61.29  | 85.66  | 1 | 2 | 4 | O |
| 12.7 | 0.6 | 4.5 | 79.83  | 112.03 | 1 | 2 | 4 |   |
| 9.8  | 0.3 | 0.9 | 52.24  | 73.69  | 1 | 1 | 1 |   |
| 5.4  | 0.3 | 1.3 | 64.42  | 90.88  | 4 | 1 | 3 |   |
| 7.0  | 0.5 | 2.6 | 78.72  | 111.07 | 3 | 1 | 3 |   |
| 8.4  | 0.1 | 1.4 | 79.88  | 112.79 | 3 | 1 | 1 | O |
| 6.7  | 1.5 | 1.9 | 91.78  | 64.98  | 3 | 2 | 4 |   |
| 5.9  | 0.1 | 2.2 | 53.98  | 76.31  | 3 | 2 | 4 | O |
| 9.5  | 0.3 | 3.2 | 74.48  | 105.74 | 3 | 2 | 2 |   |
| 7.1  | 0.0 | 0.8 | 69.00  | 98.21  | 3 | 2 | 2 |   |
| 7.5  | 0.4 | 1.3 | 68.53  | 97.64  | 2 | 2 | 4 |   |
| 8.8  | 0.4 | 1.6 | 58.76  | 83.72  | 3 | 2 | 4 | O |
| 7.5  | 0.1 | 0.5 | 50.46  | 71.94  | 3 | 2 | 4 |   |
| 7.5  | 1.7 | 2.1 | 88.26  | 61.89  | 3 | 2 | 4 |   |
| 11.0 | 0.1 | 0.7 | 57.52  | 82.13  | 4 | 2 | 4 |   |
| 8.8  | 1.1 | 3.2 | 85.86  | 122.83 | 4 | 2 | 2 |   |
| 7.8  | 0.5 | 2.2 | 73.02  | 104.74 | 1 | 2 | 4 |   |
| 8.1  | 0.4 | 2.8 | 61.89  | 88.89  | 4 | 2 | 2 |   |
| 6.4  | 0.4 | 2.8 | 60.84  | 87.49  | 1 | 2 | 4 | O |
| 7.5  | 0.3 | 0.6 | 65.01  | 45.17  | 1 | 1 | 1 |   |
| 7.6  | 0.3 | 1.1 | 57.36  | 82.65  | 2 | 2 | 4 | O |
| 7.2  | 0.6 | 2.8 | 68.36  | 98.53  | 4 | 1 | 1 |   |
| 8.9  | 1.0 | 2.0 | 79.36  | 114.40 | 3 | 1 | 1 |   |
| 7.3  | 0.9 | 2.7 | 76.65  | 110.67 | 3 | 1 | 1 |   |
| 9.0  | 0.2 | 2.6 | 64.79  | 94.09  | 1 | 1 | 3 |   |
| 9.3  | 0.2 | 0.8 | 64.57  | 93.79  | 4 | 2 | 4 |   |
| 6.9  | 0.4 | 1.8 | 58.03  | 84.31  | 1 | 2 | 4 |   |
| 5.0  | 0.1 | 2.6 | 55.93  | 81.59  | 3 | 2 | 4 |   |
| 9.1  | 0.2 | 1.8 | 59.15  | 86.57  | 1 | 2 | 3 |   |



|      |     |     |        |        |   |   |   |   |
|------|-----|-----|--------|--------|---|---|---|---|
| 10.3 | 0.4 | 1.4 | 77.31  | 113.65 | 1 | 1 | 1 | O |
| 4.5  | 0.5 | 1.7 | 70.62  | 103.84 | 2 | 1 | 1 |   |
| 8.5  | 0.3 | 2.0 | 74.05  | 108.94 | 4 | 2 | 4 |   |
| 12.7 | 0.4 | 2.9 | 71.57  | 105.82 | 4 | 1 | 1 |   |
| 9.3  | 0.4 | 1.2 | 59.08  | 87.37  | 3 | 1 | 1 |   |
| 3.5  | 0.8 | 3.0 | 71.52  | 105.80 | 4 | 1 | 1 | O |
| 9.0  | 0.2 | 1.0 | 74.82  | 110.78 | 1 | 2 | 4 |   |
| 7.9  | 0.3 | 1.5 | 60.43  | 89.51  | 4 | 2 | 4 |   |
| 9.0  | 0.5 | 1.6 | 63.86  | 94.84  | 4 | 2 | 2 |   |
| 4.6  | 0.7 | 2.2 | 78.62  | 116.84 | 3 | 2 | 2 | O |
| 4.7  | 0.5 | 1.2 | 45.88  | 68.21  | 4 | 1 | 1 |   |
| 7.6  | 0.6 | 2.7 | 78.36  | 116.78 | 4 | 1 | 1 |   |
| 6.9  | 0.1 | 1.1 | 58.22  | 86.83  | 4 | 1 | 1 |   |
| 7.0  | 0.5 | 5.7 | 59.37  | 88.87  | 3 | 1 | 1 | O |
| 5.5  | 0.6 | 2.6 | 47.68  | 71.46  | 3 | 1 | 1 |   |
| 6.9  | 0.5 | 3.5 | 73.78  | 110.72 | 4 | 1 | 1 |   |
| 7.2  | 0.4 | 0.9 | 62.82  | 94.70  | 3 | 1 | 1 |   |
| 8.7  | 0.9 | 1.4 | 65.11  | 98.40  | 4 | 1 | 1 | O |
| 7.3  | 0.6 | 1.7 | 52.94  | 80.04  | 3 | 1 | 1 |   |
| 5.8  | 0.3 | 1.1 | 64.53  | 97.63  | 4 | 2 | 4 |   |
| 5.0  | 0.2 | 1.6 | 72.65  | 47.97  | 4 | 1 | 1 |   |
| 6.8  | 0.3 | 1.3 | 87.71  | 57.79  | 4 | 2 | 4 |   |
| 8.8  | 0.7 | 2.3 | 68.97  | 104.69 | 4 | 1 | 3 |   |
| 11.3 | 0.1 | 1.6 | 64.38  | 97.97  | 3 | 2 | 4 |   |
| 8.2  | 0.0 | 1.0 | 49.18  | 74.90  | 2 | 1 | 3 |   |
| 11.7 | 0.3 | 1.4 | 62.46  | 95.22  | 4 | 2 | 4 |   |
| 7.7  | 0.4 | 4.3 | 78.34  | 119.99 | 2 | 2 | 4 |   |
| 4.9  | 0.5 | 1.5 | 58.87  | 90.19  | 4 | 2 | 4 |   |
| 9.8  | 0.7 | 3.3 | 60.66  | 92.93  | 4 | 2 | 2 |   |
| 7.2  | 0.3 | 1.8 | 54.56  | 83.63  | 4 | 2 | 4 |   |
| 7.9  | 0.3 | 2.7 | 71.59  | 109.83 | 4 | 1 | 1 |   |
| 6.0  | 0.3 | 1.8 | 66.92  | 102.82 | 4 | 2 | 4 |   |
| 7.6  | 0.3 | 1.0 | 51.02  | 78.52  | 4 | 1 | 1 |   |
| 7.6  | 0.2 | 2.1 | 51.13  | 78.74  | 3 | 1 | 3 |   |
| 6.4  | 0.7 | 1.3 | 74.23  | 48.16  | 3 | 1 | 1 |   |
| 8.6  | 0.2 | 2.4 | 62.51  | 96.42  | 4 | 2 | 4 |   |
| 6.9  | 0.3 | 0.5 | 68.98  | 106.42 | 4 | 1 | 1 |   |
| 9.8  | 0.7 | 4.2 | 90.34  | 139.50 | 4 | 1 | 1 |   |
| 7.1  | 0.2 | 4.8 | 61.79  | 95.49  | 3 | 2 | 4 | O |
| 9.4  | 0.2 | 2.1 | 57.74  | 89.30  | 4 | 2 | 2 | O |
| 6.7  | 0.4 | 1.6 | 117.28 | 75.72  | 3 | 2 | 4 | O |
| 8.9  | 0.1 | 1.2 | 58.27  | 90.46  | 2 | 1 | 3 |   |
| 6.6  | 2.4 | 2.6 | 88.07  | 56.66  | 4 | 1 | 1 |   |
| 7.6  | 0.4 | 1.3 | 54.27  | 84.45  | 4 | 2 | 2 |   |
| 8.1  | 0.4 | 3.3 | 66.16  | 103.11 | 4 | 2 | 4 |   |
| 7.2  | 0.6 | 3.4 | 67.04  | 104.57 | 2 | 1 | 1 | O |
| 6.5  | 0.1 | 1.0 | 50.61  | 78.99  | 4 | 2 | 2 |   |
| 10.6 | 0.2 | 1.3 | 74.05  | 115.83 | 2 | 1 | 1 |   |
| 9.0  | 0.4 | 1.0 | 48.15  | 75.36  | 2 | 2 | 2 |   |
| 7.9  | 0.2 | 1.8 | 68.22  | 106.79 | 4 | 1 | 3 |   |



|      |     |     |       |        |   |   |   |   |
|------|-----|-----|-------|--------|---|---|---|---|
| 6.6  | 0.5 | 1.4 | 71.15 | 111.51 | 2 | 1 | 1 |   |
| 7.0  | 0.2 | 0.7 | 56.86 | 89.15  | 4 | 2 | 2 |   |
| 10.3 | 0.8 | 3.8 | 68.41 | 107.55 | 2 | 1 | 3 |   |
| 7.1  | 0.5 | 1.7 | 70.85 | 112.35 | 3 | 1 | 3 |   |
| 7.8  | 0.6 | 1.9 | 60.88 | 96.74  | 2 | 2 | 4 |   |
| 9.9  | 0.1 | 2.3 | 44.37 | 70.61  | 3 | 2 | 4 | O |
| 5.5  | 1.4 | 3.0 | 70.58 | 112.37 | 1 | 2 | 4 |   |
| 7.6  | 0.2 | 0.7 | 34.14 | 54.41  | 4 | 2 | 4 |   |
| 7.9  | 0.2 | 1.0 | 78.75 | 125.56 | 2 | 2 | 4 | O |
| 10.3 | 0.8 | 2.2 | 59.67 | 95.25  | 4 | 1 | 3 |   |
| 10.3 | 0.4 | 0.8 | 71.65 | 115.47 | 4 | 1 | 1 |   |
| 10.8 | 0.2 | 1.4 | 58.08 | 94.06  | 4 | 1 | 1 |   |
| 4.5  | 0.4 | 3.0 | 69.47 | 112.91 | 4 | 1 | 1 |   |
| 8.3  | 0.2 | 2.2 | 59.03 | 96.61  | 1 | 2 | 4 | O |
| 7.5  | 0.2 | 2.5 | 57.98 | 95.07  | 4 | 2 | 4 |   |
| 8.3  | 0.2 | 0.8 | 49.11 | 80.90  | 4 | 2 | 4 |   |
| 7.4  | 0.5 | 2.6 | 50.59 | 83.45  | 2 | 1 | 1 | O |
| 10.3 | 0.6 | 2.9 | 84.90 | 140.29 | 4 | 2 | 4 |   |
| 8.0  | 1.0 | 2.1 | 63.61 | 105.30 | 2 | 1 | 3 | O |
| 5.3  | 0.5 | 2.2 | 82.25 | 136.23 | 4 | 2 | 4 |   |
| 6.4  | 0.3 | 4.3 | 69.41 | 115.15 | 4 | 1 | 1 |   |
| 7.3  | 0.3 | 1.3 | 56.54 | 93.93  | 1 | 2 | 2 |   |
| 7.1  | 0.3 | 1.1 | 50.66 | 84.21  | 4 | 1 | 1 |   |
| 4.8  | 0.3 | 1.9 | 50.34 | 83.93  | 2 | 2 | 4 |   |
| 6.0  | 0.4 | 1.4 | 49.44 | 82.64  | 2 | 1 | 1 |   |
| 8.5  | 0.4 | 1.4 | 70.43 | 117.95 | 2 | 1 | 1 | O |
| 7.7  | 1.0 | 3.2 | 59.66 | 100.31 | 2 | 1 | 1 |   |
| 7.4  | 0.5 | 1.8 | 67.30 | 113.46 | 2 | 1 | 1 |   |
| 8.9  | 0.6 | 1.3 | 61.08 | 103.09 | 2 | 1 | 1 |   |
| 8.1  | 0.0 | 1.9 | 52.06 | 88.23  | 2 | 1 | 2 |   |
| 7.3  | 0.1 | 3.8 | 57.43 | 97.41  | 2 | 1 | 1 |   |
| 6.1  | 0.7 | 1.6 | 59.81 | 101.72 | 2 | 1 | 1 |   |
| 10.1 | 0.4 | 2.0 | 62.10 | 105.64 | 4 | 1 | 1 |   |
| 5.9  | 0.4 | 2.2 | 74.05 | 126.21 | 2 | 1 | 1 |   |
| 8.5  | 0.0 | 1.2 | 49.83 | 84.99  | 3 | 1 | 3 | O |
| 6.2  | 0.2 | 0.6 | 73.91 | 43.32  | 4 | 1 | 3 |   |
| 10.8 | 0.4 | 3.2 | 73.91 | 126.17 | 4 | 1 | 1 |   |
| 6.8  | 0.1 | 1.0 | 53.75 | 91.98  | 3 | 2 | 1 |   |
| 7.1  | 0.4 | 3.6 | 71.46 | 122.64 | 1 | 2 | 4 |   |
| 4.9  | 0.7 | 4.6 | 61.90 | 106.42 | 2 | 1 | 1 | O |
| 9.0  | 0.4 | 0.8 | 59.54 | 102.68 | 4 | 2 | 4 |   |
| 7.3  | 0.3 | 4.3 | 63.23 | 109.13 | 2 | 2 | 4 | O |
| 7.3  | 0.3 | 1.5 | 55.97 | 96.66  | 2 | 2 | 4 |   |
| 8.5  | 1.2 | 2.9 | 62.34 | 107.77 | 2 | 2 | 4 |   |
| 9.7  | 0.1 | 0.8 | 50.14 | 87.21  | 2 | 2 | 4 |   |
| 7.8  | 0.2 | 1.6 | 57.81 | 100.64 | 2 | 2 | 4 |   |
| 9.9  | 0.0 | 1.7 | 60.13 | 104.99 | 4 | 2 | 4 |   |
| 7.0  | 0.2 | 1.3 | 61.00 | 106.74 | 4 | 1 | 3 |   |
| 6.9  | 0.5 | 2.0 | 46.99 | 82.50  | 4 | 1 | 3 |   |
| 7.4  | 0.2 | 2.6 | 58.82 | 103.42 | 4 | 1 | 3 |   |



|      |     |     |       |        |   |   |   |   |
|------|-----|-----|-------|--------|---|---|---|---|
| 9.1  | 0.4 | 2.0 | 63.27 | 111.69 | 4 | 2 | 4 |   |
| 8.8  | 0.2 | 0.8 | 53.47 | 94.45  | 1 | 1 | 3 |   |
| 8.6  | 0.6 | 2.4 | 61.37 | 108.53 | 1 | 1 | 3 |   |
| 7.5  | 0.1 | 1.7 | 59.92 | 106.18 | 1 | 2 | 2 | O |
| 15.6 | 0.2 | 1.3 | 65.63 | 116.37 | 1 | 2 | 2 |   |
| 7.8  | 0.5 | 1.3 | 56.60 | 100.40 | 1 | 1 | 1 |   |
| 8.4  | 0.1 | 1.1 | 51.17 | 90.90  | 4 | 1 | 3 |   |
| 11.6 | 0.1 | 2.0 | 56.26 | 100.42 | 4 | 1 | 1 |   |
| 7.0  | 0.3 | 3.0 | 40.04 | 71.75  | 2 | 2 | 4 |   |
| 7.0  | 0.0 | 1.2 | 42.87 | 77.06  | 4 | 1 | 1 |   |
| 6.8  | 1.0 | 2.0 | 57.02 | 102.53 | 4 | 1 | 3 | O |
| 9.4  | 0.3 | 1.1 | 52.13 | 93.87  | 4 | 1 | 1 |   |
| 10.7 | 0.1 | 0.7 | 43.05 | 77.53  | 4 | 1 | 1 |   |
| 4.6  | 1.0 | 1.5 | 90.74 | 50.05  | 1 | 2 | 2 | O |
| 8.3  | 0.1 | 1.2 | 58.07 | 105.59 | 4 | 1 | 3 |   |
| 8.4  | 0.4 | 1.2 | 61.33 | 111.52 | 4 | 1 | 1 |   |
| 6.4  | 0.7 | 2.6 | 47.14 | 85.81  | 4 | 1 | 3 |   |
| 7.1  | 0.4 | 1.1 | 60.84 | 110.99 | 2 | 1 | 3 |   |
| 7.1  | 0.2 | 1.4 | 50.06 | 92.59  | 2 | 1 | 1 | O |
| 7.1  | 0.4 | 3.5 | 66.48 | 123.09 | 2 | 1 | 3 |   |
| 7.7  | 0.1 | 2.0 | 58.22 | 108.00 | 1 | 1 | 3 |   |
| 6.4  | 0.6 | 3.4 | 61.51 | 114.90 | 2 | 1 | 1 |   |
| 7.6  | 0.4 | 1.1 | 55.84 | 105.14 | 4 | 1 | 1 | O |
| 6.8  | 0.1 | 1.1 | 67.00 | 127.99 | 1 | 1 | 3 | O |
| 8.1  | 0.3 | 1.6 | 58.65 | 112.35 | 4 | 1 | 1 |   |
| 9.7  | 0.3 | 2.9 | 57.56 | 111.12 | 1 | 2 | 2 |   |
| 9.3  | 0.8 | 4.2 | 77.78 | 152.08 | 4 | 2 | 2 | O |
| 7.2  | 0.3 | 1.4 | 57.42 | 112.37 | 2 | 2 | 2 |   |
| 8.1  | 0.2 | 1.1 | 48.29 | 95.10  | 4 | 2 | 2 | O |
| 11.3 | 0.3 | 1.4 | 48.40 | 95.97  | 2 | 2 | 2 | O |
| 5.4  | 0.2 | 2.3 | 47.57 | 94.49  | 2 | 2 | 4 | O |
| 7.4  | 0.4 | 1.9 | 41.82 | 83.14  | 2 | 2 | 2 | O |
| 5.0  | 0.1 | 1.2 | 39.81 | 79.64  | 1 | 2 | 2 |   |
| 5.4  | 1.8 | 2.9 | 86.02 | 42.93  | 4 | 2 | 4 |   |
| 6.2  | 0.3 | 1.2 | 47.44 | 95.22  | 4 | 2 | 2 |   |
| 7.2  | 0.5 | 2.0 | 49.01 | 99.15  | 1 | 2 | 2 | O |
| 7.6  | 0.1 | 1.8 | 44.06 | 89.28  | 1 | 2 | 2 |   |
| 9.2  | 0.1 | 1.5 | 49.00 | 99.42  | 1 | 2 | 2 |   |
| 11.7 | 0.8 | 2.4 | 57.85 | 117.47 | 1 | 2 | 2 |   |
| 8.5  | 0.4 | 3.0 | 45.11 | 95.45  | 2 | 2 | 2 |   |
| 10.1 | 0.3 | 3.2 | 54.47 | 115.93 | 4 | 1 | 1 | O |
| 8.6  | 0.3 | 2.8 | 44.60 | 96.55  | 4 | 1 | 3 |   |
| 8.6  | 0.2 | 1.5 | 40.20 | 87.36  | 4 | 1 | 3 |   |
| 7.6  | 0.3 | 2.4 | 50.10 | 109.31 | 4 | 2 | 2 | O |
| 11.1 | 0.2 | 3.0 | 50.86 | 111.18 | 1 | 2 | 2 | O |
| 8.3  | 0.4 | 1.5 | 44.64 | 98.02  | 4 | 2 | 2 | O |
| 12.0 | 0.3 | 2.2 | 45.47 | 101.20 | 1 | 2 | 2 | O |
| 5.5  | 0.4 | 0.8 | 95.24 | 42.03  | 2 | 2 | 2 | O |
| 8.5  | 0.4 | 2.2 | 35.57 | 85.03  | 1 | 2 | 2 |   |
| 9.4  | 0.1 | 1.8 | 45.69 | 111.51 | 1 | 2 | 2 | O |



|      |     |     |        |        |   |   |   |   |
|------|-----|-----|--------|--------|---|---|---|---|
| 8.0  | 0.0 | 2.6 | 42.72  | 108.45 | 2 | 2 | 2 |   |
| 12.1 | 0.2 | 3.9 | 59.99  | 152.30 | 2 | 2 | 2 |   |
| -    | 3.5 | -   | 112.61 | -      | 2 | 2 | 2 | O |
| -    | 0.6 | -   | 87.22  | -      | 4 | 2 | 2 | O |
| -    | 1.0 | -   | 78.11  | -      | 4 | 2 | 2 | O |
| -    | 1.7 | -   | 77.86  | -      | 1 | 2 | 2 | O |
| -    | 1.5 | -   | 69.96  | -      | 1 | 2 | 2 | O |
| -    | 0.3 | -   | 69.66  | -      | 2 | 2 | 2 |   |
| -    | 1.2 | -   | 69.25  | -      | 2 | 2 | 2 |   |
| -    | 0.6 | -   | 62.89  | -      | 1 | 2 | 2 | O |
| -    | 0.5 | -   | 59.83  | -      | 2 | 2 | 2 | O |
| -    | 0.7 | -   | 57.20  | -      | 4 | 2 | 4 | O |
| -    | 0.5 | -   | 42.28  | -      | 1 | 2 | 2 | O |
| 8.4  | 0.4 | 1.6 | 69.08  | 89.40  | 4 | 1 | 1 |   |
| 10.0 | 0.7 | 3.2 | 108.26 | 94.26  | 4 | 1 | 1 |   |
| 7.4  | 0.5 | 1.7 | 65.08  | 84.35  | 4 | 2 | 4 | O |

; EGCG, (-)-Epigallocatechin 3-gallate; GC, (-)-Gallocatechin; GCG, (-)-
