# Supplementary material
Source: MDPI journal article supplement (https://www.mdpi.com/2073-4395/10/11/1667)
Supplement: s1 [file s1 › Supplementary Tables S2.pdf]

Table S2. List of 33 SSR primers in this study.

| locus   | Linkage group | Forward                  | Reverse                       |
|---------|---------------|--------------------------|-------------------------------|
| MSE0029 | LG03          | ATAGCCAATCAAGCTCCTCCTCCT | AGTCTGTTCTCCCTTGATGATCG       |
| MSE0083 | LG12          | GAGGAAAGAGATTATGCGGTGTGG | GTGAGCCTTCAAAAGACAGCAACG      |
| MSE0107 | LG11          | TCTCTCTACTCCTGCGCAATCTCA | TCAAAGATGTTGCTCTCGTCAACC      |
| MSE0113 | LG09          | TACCTTCTGCAACTCCAGCAATCC | TGAGATTGACCATCTTTCATCGGA      |
| MSE0173 | LG02          | GTGTTACCAACAACCTCACCAAGG | TGTCGAACAAAGATACACCCCAA       |
| MSE0237 | LG08          | CTCTCCTTCTTCACACCCTCCAAA | TTGTTCTCAAAGAACCTCCTTCGC      |
| MSE0291 | LG08          | AATCAAATAACACTTGCACCCGC  | AAAAAGAGAAAGTCACGTCCACGG      |
| MSE0313 | LG05          | TGCTATGCCGCCTAACAAAACTT  | ACCACCAACAACAATTCCCACTCT      |
| MSG0403 | LG07          | ATGATCGCCGGTTTAGAGATGAAT | GTTTAAGCTGGCTAACCTACACGGAGC   |
| MSG0258 | LG01          | ACTCATCACCATGCCTTCTCCATC | GTTTAGCTCAACTGGTGGAACCTCAACT  |
| MSG0361 | LG01          | AGATGGAGGTAGAGAGAGAGGCAC | GTTTGTCCCTCTCATTTTCAACGC      |
| MSG0380 | LG04          | ACAGACCTTCACCCTCTCCATTTC | GTTTACCTCTGCCTTCGTTCTTCAGC    |
| MSG0423 | LG06          | ACTCCATGTGCTGCTCTGTAGTTC | GTTTGCAGGAAGTTGAGCCAGAC       |
| MSG0429 | LG02          | AGGACCGTTCTTCCCTACCTGTAA | GTTTGAGATTGAGGATGTGGTCGTTGT   |
| MSG0470 | LG13          | ATAGGGTTTCGAAAATGGCAGG   | GTTTGAGGTGGCAAGTTTGTGACTGT    |
| MSG0610 | LG06          | ACAGAGGAGGAAGATGATCGGTAA | GTTTGAAGAAGAAGAAAACCTCCCGCCAT |
| MSG0681 | LG10          | AGGGTTTGCCTCTTCAAAGAGAGA | GTTTGTAACTTGCCACGTTTCG        |
| MSG0699 | LG15          | ATGCGACAGTGTGCTGAGATTTT  | GTTTCAAAAATGGGGTGTCTACAGAGGG  |
| TM241   | LG12          | ATCGGCGACGGTGGAAGT       | GCCAGCGGAGAGGAGAAG            |
| TM324   | LG07a         | CATCGTTTCATTGCTTATT      | ATTTTCGGCATTGTCTT             |
| TM337   | LG03          | GTGCGGCAAAGCTGTCTT       | ACCTCCATCTCCAAACCC            |
| TM341   | LG06          | CGTACTTCAACGCTATAGCTCTCT | CTTCGGCATGGCTTCTAAAC          |
| TM351   | LG14a         | GGGTGAGAGTAAAGGGGGAG     | AAACACAAAATCAAATTTGTCAGAA     |
| TM382   | LG13          | TCTCAAAACCAAATAGGCTCAA   | TTGCGTTATGATTTCTGGGA          |
| TM422   | LG04          | GGACTTCGTTGCTTCCTTTG     | CCATTCTCGACGAATCCAGT          |
| TM428   | LG05          | TCTCCTCCTCGATCCTCAGA     | CCCTCTTCTTCGGATCCTTC          |
| TM447   | LG01          | TGTTGTTAACGGTGTTTCGGA    | GCATTTGTTTTCTCTCTCTGCC        |
| TM461   | LG11a         | GGCTAGGGTTTCTCCCACTT     | GAAGGTCGAAGCGATGTTGT          |
| TM480   | LG02          | CGAAGAGTCGTTTCGAGGAG     | CATCCCTTGTCTTCTCCCT           |
| TM530   | LG14a         | CCGTGTTTACCACCACCCT      | CCCTGGGAACAAGAAAGTGA          |
| TM576   | LG13          | CGCTCTTCCTTGTTTTCTGG     | CACAAGCCATTGTAGAGAGAGAAA      |
| TM581   | LG11a         | AAGGATCACTGGTAAAAAGCCA   | CTTCTGAGCCGTTCTTGAGC          |
| TM604   | LG10          | TCTCAATCAAGGTTCCGAGG     | TGACATATTCGCCCAACAAA          |

[illegible]
