# Supplementary material
Source: MDPI journal article supplement (https://www.mdpi.com/2073-4395/10/11/1667)
Supplement: s1 [file s1 › Supplementary TablesS3.pdf]

Table S3. Mean squares for phytochemicals according to year, accessions, and year x accession interactions

|                | Accessions | Year        | Interaction |
|----------------|------------|-------------|-------------|
| C <sup>a</sup> | 1.657***   | 37.790***   | 0.703       |
| Caf            | 6.196***   | 121.877***  | 66.3***     |
| CG             | 1.769***   | 133.864***  | 0.958       |
| EC             | 3.496***   | 292.692***  | 1.684***    |
| ECG            | 10.474***  | 5095.465*** | 5.333***    |
| EGCG           | 8.473***   | 183.470***  | 3.560***    |
| GC             | 1.468***   | 1965.465*** | 1.325***    |
| GCG            | 6.979***   | 3350.885*** | 3.416***    |
| TC             | 4.496***   | 1911.155*** | 2.390***    |

<sup>a</sup> C, (+)-Catechin; Caf, Caffeine; CG, (-)-Catechin 3-gallate; EC, (-)-Epicatechin; ECG, (-)-Epigallocatechin 3-gallate; EGCG, (-)-Epigallocatechin 3-gallate; GC, (-)-Gallocatechin; GCG, (-)-Gallocatechin 3-gallate; TC, total catechin: \*\*\*,  $p < 0.001$
