# Supplementary material
Source: MDPI journal article supplement (https://www.mdpi.com/2073-4395/10/11/1667)
Supplement: s1 [file s1 › Supplementary Tabless4.pdf]

Table S4. Multivariate analysis of variance (MANOVA) to study yearly differences in all quantitative traits together

| Effect            | Value   | F      | Sig.   |
|-------------------|---------|--------|--------|
| Accessions        | 4.181   | 2.421  | <0.001 |
| Year              | 0.58628 | 256.85 | <0.001 |
| Accessions * Year | 4.6872  | 3.1189 | <0.001 |
